# Transmission cycles generate diversity in pathogenic viruses

Daniel Sigal<sup>†,1,2</sup>, J.N.S. Reid<sup>†,1</sup> and L.M. Wahl<sup>1,\*</sup>

<sup>†</sup>Contributed equally

<sup>1</sup>Applied Mathematics, Western University, London, Ontario, Canada N6A 5B7

<sup>2</sup>Schulich School of Medicine & Dentistry, Western University, London, Ontario, Canada N6A 5B7

\*Corresponding author: [lwahl@uwo.ca](mailto:lwahl@uwo.ca)

Running title: Transmission cycle diversity

## Abstract

We investigate the fate of *de novo* mutations that occur during the in-host replication of a pathogenic virus, predicting the probability that such mutations are passed on during disease transmission to a new host. Using influenza A virus as a model organism, we develop a life-history model of the within-host dynamics of the infection, using a multitype branching process with a coupled deterministic model to capture the population of available target cells. We quantify the fate of neutral mutations and mutations affecting five life-history traits: clearance, attachment, budding, cell death, and eclipse phase timing. Despite the severity of disease transmission bottlenecks, our results suggest that in a single transmission event, several mutations that appeared *de novo* in the donor are likely to be transmitted to the recipient. Even in the absence of a selective advantage for these mutations, the sustained growth phase inherent in each disease transmission cycle generates genetic diversity that is not eliminated during the transmission bottleneck.

Keywords: mutation, disease transmission, adaptation, influenza, life history

## INTRODUCTION

1

Many pathogens experience population dynamics characterized by periods of rapid expansion, while a host is colonized, interleaved with extreme bottlenecks during transmission to new hosts. The effect of these transmission cycles on pathogen evolution has been well-studied, with particular focus on long-standing predictions regarding the evolution of virulence (reviewed in ALIZON *et al.* 2009), conflicting pressures of within- and between-host fitness (GILCHRIST and SASAKI 2002; COOMBS *et al.* 2007; DAY *et al.* 2011; see MIDEO *et al.* 2008 for review), or broader factors affecting the evolutionary emergence of pathogenic strains (ANTIA *et al.* 2003; IWASA *et al.* 2003; RELUGA *et al.* 2007; ALEXANDER and DAY 2010; see GANDON *et al.* 2012 for review).

In the experimental evolution of microbial populations, the impact of population bottlenecks has also been studied in some depth, both theoretically (BERGSTROM *et al.* 1999; WAHL and GERRISH 2001; WAHL *et al.* 2002) and experimentally (BURCH and CHAO 1999; ELENA *et al.* 2001; RAYNES *et al.* 2014; LACHAPELLE *et al.* 2015; VOGWILL *et al.* 2016). While severe population bottlenecks clearly reduce genetic diversity, the period of growth between bottlenecks can have the reverse effect: generating substantial *de novo* adaptive mutations and promoting their survival (WAHL *et al.* 2002). The survival of a novel adaptive lineage is predicted to depend not only to the timing and severity of bottlenecks, but on the details of the microbial life history and the trait affected by the mutation (ALEXANDER and WAHL 2008; PATWA and WAHL 2008; WAHL and ZHU 2015).

The effects of transmission bottlenecks on the evolution of an RNA virus have been explicitly studied in a series of experimental papers, demonstrating that severe bottlenecks (one surviving individual) reduced fitness (DUARTE *et al.* 1992) despite rapid population expansion between transmission events (DUARTE *et al.* 1993). The magnitude of this effect depends on both the initial fitness of the lineage (NOVELLA *et al.* 1995) and on bottleneck severity (NOVELLA *et al.* 1996). In theoretical work, a model of a viral quasispecies undergoing periodic transmission events predicts that

pathogens should maintain a mutation-selection balance with high virulence if the pathogen is horizontally transferred, if the bottleneck size is not too small, and if the number of generations between bottlenecks is large (BERGSTROM *et al.* 1999).

Unlike the bottlenecks imposed in serial passaging, transmission bottlenecks in nature are not constrained by experimental control. Thus, key parameters such as the bottleneck size – the number of microbes initiating an infection – have proven difficult to estimate. Nonetheless experimental models (see ABEL *et al.* 2015 for review), as well as recent techniques such as DNA barcoding (VARBLE *et al.* 2014) and sequencing of donor-recipient pairs in humans (POON *et al.* 2016) have shed new light on this issue. In addition, we note that many human viruses – including human immunodeficiency virus, hepatitis B virus, and influenza A virus – reproduce by viral budding in the context of a potentially limited target cell population (GAROFF *et al.* 1998); the survival of *de novo* mutations has not yet been predicted for this microbial life history. Thus, the effects of transmission bottlenecks on the genetic diversity of viral pathogens, that is, on the fate of *de novo* mutations, are as yet unknown.

In this contribution, we first develop a deterministic model of the within-host dynamics of early infection by a viral pathogen. We couple this to a detailed life-history model, using a branching process approach to follow the fate of specific *de novo* mutations that are either phenotypically neutral, or affect various life-history traits. These techniques allow us to predict which adaptive changes in virus life history are most likely to persist, and how the diversity of the viral sequence is predicted to change between donor and recipient. We can thus predict, for example, the rate at which *de novo* single nucleotide polymorphisms arise during the course of a single infection, and are transmitted to a subsequent host.

Throughout the paper, we will illustrate our results with parameters that have been chosen to model the life history and transmission dynamics of influenza A virus (IAV). IAV is an orthomyxovirus

(BOUVIER and PALESE 2008) that imposes a significant burden on global health, causing seasonal epidemics, sporadic pandemics, morbidity and mortality (CARRAT and FLAHAULT 2007). It is estimated that infection with seasonal strains of influenza results in around 36,000 deaths per year in the United States, although exact numbers are difficult to determine (CHOWELL *et al.* 2008).

Mathematical modelling is a well-established tool for predicting the evolution of influenza (LARSON *et al.* 1976; BOCHAROV and ROMANYUKHA 1994). Because of the critical importance of immune evasion in influenza, interest has focused on the adaptation of the virus in response to immune pressure, focusing on antigenic drift (BOIANELLI *et al.* 2015) and antigenic shift (FENG *et al.* 2011) in the global influenza pandemic (VAN DE SANDT *et al.* 2012). Recent models, however, have specifically addressed the within-host dynamics of influenza A virus (BEAUCHEMIN *et al.* 2005; BACCAM *et al.* 2006; BEAUCHEMIN and HANDEL 2011; SMITH and PERELSON 2011; DOBROVOLNY *et al.* 2013; BOIANELLI *et al.* 2015). In concert with these contributions, recent empirical work has elucidated the life history of the influenza A virus, providing quantitative estimates of parameters such as the minimum infectious dose (VARBLE *et al.* 2014; POON *et al.* 2016), the size of the target cell population, and the kinetics of viral budding (BACCAM *et al.* 2006; BEAUCHEMIN and HANDEL 2011; PINILLA *et al.* 2012). Although we now have an increasingly clear picture of the within-host life history of this important pathogen (BEAUCHEMIN and HANDEL 2011; BIGGERSTAFF *et al.* 2014), estimates of the rate at which *de novo* mutations arise and are transmitted have not yet been available. Our approach allows direct access to this question.

## LIFE HISTORY AND TRANSMISSION MODEL

**Deterministic Model** We use a system of ordinary differential equations (ODEs) to approximate the within-host dynamics during the early stages of infection by a pathogenic virus, assuming a life history that involves infection of a target cell, an eclipse phase, and finally an infectious stage.

Specifically, we propose:

72

$$\left. \begin{aligned} \text{target cells:} \quad \frac{dy_T}{dt} &= -\alpha y_T(t)v(t) \\ \text{infected (eclipse):} \quad \frac{dy_E}{dt} &= \alpha y_T(t)v(t) - (D + E)y_E(t) \\ \text{budding cells:} \quad \frac{dy_B}{dt} &= E y_E(t) - D y_B(t) \\ \text{free virus:} \quad \frac{dv}{dt} &= -Cv(t) + B y_B(t) - \alpha y_T(t)v(t) \end{aligned} \right\}. \quad (1)$$

Here  $y_T$  represents susceptible target cells (in the case of influenza A virus we consider epithelial cells of the upper respiratory tract),  $y_E$  represents cells that are infected by the virus but not yet in the budding stage,  $y_B$  represents mature infected cells (infected cells that are budding), and  $v$  represents the free virus, that is, virions not attached to target cells (BACCAM *et al.* 2006). Parameter  $B$  gives the rate at which budding cells produce infectious free virus;  $C$  gives the clearance rate for free virus. Infected cells die at constant rate  $D$ , while  $E$  represents the rate at which infected cells mature, leaving the eclipse phase and becoming budding cells. The parameter  $\alpha$  gives the rate of attachment per available target cell. Thus the overall attachment rate for a virion is a function of the time-varying target cell population, and can be written  $A(t) = \alpha y_T(t)$ , with the corresponding mean attachment time,  $A(t)^{-1}$ .

73

74

75

76

77

78

79

80

81

82

A limitation of ODE approaches is that all transitions are described by exponential distributions. To relax this assumption, we introduce a sequence of  $k$  infected stages through which infected cells pass before reaching the budding stage. This ‘chain of independent exponentials’ allows for more realistic gamma distributions of eclipse times (WAHL and ZHU 2015). Specifically, we replace system (1) with:

83

84

85

86

87

$$\left. \begin{aligned} \text{target cells:} \quad \frac{dy_T}{dt} &= -\alpha y_T(t)v(t) \\ \text{eclipse stage 1:} \quad \frac{dy_1}{dt} &= \alpha y_T(t)v(t) - (D + kE)y_1(t) \\ \text{eclipse stage } 2 \dots k \quad \frac{dy_j}{dt} &= kE y_{j-1}(t) - (D + kE)y_j(t) \quad j = 2 \dots k \\ \text{budding:} \quad \frac{dy_B}{dt} &= kE y_k(t) - D y_B(t) \\ \text{free virus:} \quad \frac{dv}{dt} &= -Cv(t) + B y_B(t) - \alpha y_T(t)v(t) \end{aligned} \right\}. \quad (2)$$

When  $k = 1$ , this model reduces to System 1; for  $k > 1$ ,  $y_1$  gives the population of initially infected

88

cells, which pass through  $k$  eclipse stages at rate  $kE$  before budding. The transition rate  $kE$  is set such that the expected time in the eclipse phase, in total, is fixed at  $1/E$  for any value of  $k$ . In the supplementary material, we also investigate a model in which the death term,  $D$ , is set to zero during the eclipse stages and only acts during the budding stage. This likewise gives a more realistic distribution for the lifetime of infected cells.

The founding virus begins as an initial population of free virus (the initial infectious dose,  $v(0) = v_0$ ) at time  $t = 0$ . We do not assume that all viral particles in the founding dose are genetically identical, but we do assume that they are phenotypically identical, that is, they are described by the same parameter values in the deterministic model. As described further in the stochastic model below, we assume that disease transmission occurs at time  $\tau$  during the peak viral shedding period (when the free virus population,  $v$  is at or near a peak value). For the transmission event to a new susceptible individual, a new founding population is sampled from the total viral load. In particular, each free viral particle becomes part of the infectious dose transmitted to the next individual with probability  $F$ . The value of  $F$  is computed such that for the founding virus, the expected size of the transmitted sample is  $v_0$ , that is,  $F = v_0/v(\tau)$ . Note that only free virions – those not yet attached to a target cell – are transferred to the next individual during transmission.

Immune responses clearly play a critical role in the within-host dynamics of viral infections, as well-documented for models of influenza A (BEAUCHEMIN and HANDEL 2011; SMITH and PERELSON 2011; DOBROVOLNY *et al.* 2013). In the model proposed above, innate immune mechanisms are included in the clearance rate of free virus and the death rate of infected cells. Because we use this model only until the time of peak viral shedding, which occurs 54.5 hours post infection (see parameter values, below) and before the adaptive immune response is activated (TAMURA and KURATA 2004), we do not include the adaptive immune response. We address this issue further in the Discussion. Likewise, we do not include replenishment of the susceptible target cell population over the initial 54.5 hours of the infection. This is consistent with complete desquamation of the epithelium (loss of all ciliated cells) within three days post-infection in murine influenza, followed

by regeneration of the epithelial cells beginning five days post-infection (RAMPHAL *et al.* 1979). 115

**Stochastic Life History Model** To describe the lineage associated with a rare *de novo* mutation, 116  
a stochastic model is required. To gain tractability, we assume that the mutant lineage propagates 117  
in an environment for which the overall dynamics of the target cell population are driven by the 118  
deterministic system (2). Thus we treat the free virus, eclipse-phase cells and budding cells in the 119  
mutant lineage stochastically, but use the deterministic system to predict the susceptible target cell 120  
population at any time. 121

As in the deterministic model, free virions clear at a constant rate  $C$  or adsorb to susceptible host 122  
cells at rate  $A(t)$ . Note that the attachment rate of a free virion is not constant; it depends on 123  
target cell availability, such that  $A(t) = \alpha y_T(t)$ , where  $y_T(t)$  is the target cell population predicted 124  
by system (2). Host cells enter the eclipse phase when a virion adsorbs, and exit the eclipse phase 125  
at rate  $E$ . After the eclipse phase, mature infected cells bud virions at rate  $B$ . Since budding itself 126  
does not immediately kill the host cells (GAROFF *et al.* 1998), after infection the cell is subject to 127  
a constant death rate  $D$ , or in other words the cell remains alive for an average time  $1/D$ . 128

This stochastic growth process can be described as a branching process, using a multitype proba- 129  
bility generating function (pgf) to describe a single lineage of free virions (associated with dummy 130  
variable  $(x_1)$ , infected cells  $(x_2)$ , and mature cells  $(x_3)$ ). As derived in the Appendix, the pgf for this 131  
process,  $G(t, x_1, x_2, x_3)$ , satisfies: 132

$$\begin{aligned} \frac{\partial G}{\partial t} = & (A(t)x_2 + C - (A(t) + C)x_1) \frac{\partial G}{\partial x_1} \\ & + (-(E + D)x_2 + Ex_3 + D) \frac{\partial G}{\partial x_2} \\ & + (Bx_1x_3 + D - (D + B)x_3) \frac{\partial G}{\partial x_3} \end{aligned} \quad (3)$$



where  $A(t)$ ,  $B$ ,  $C$ ,  $D$  and  $E$  are attachment, budding, clearance, cell death and eclipse maturation rates, respectively. Equation (3) captures the time evolution of the pgf, given each of these probabilistic events. As shown in the Appendix, Equation (3) can be converted to a system of ODEs using the standard method of characteristics, and is thus amenable to numerical solution. Analogous to System (2), Equation (3) can also be extended to include a chain of  $k$  infected stages before the budding stage, yielding more realistic distributions of the eclipse time.

To estimate the probability that the lineage associated with a *de novo* mutation does not survive the transmission bottleneck, we will need a pgf describing a complete cycle of in-host growth followed by a transmission bottleneck. We thus numerically integrate the pgf  $G$ , described above, from time 0 to time  $\tau$ , and then compose it with a pgf describing disease transmission. To describe disease transmission, we simply assume that each free virion in the infected host is transmitted with fixed probability  $F$ , as described above. As derived in the appendix, this approach allows us to estimate the probability that a *de novo* mutation that first occurs at time  $t_0$  is transmitted to the next host,  $1 - X(t_0)$ , the rate at which such “surviving” mutations arise at each time during the infection,  $\nu(t_0)$ , and, ultimately, the probability that a given mutation occurs *de novo* and is transmitted to the next host,  $\mathcal{P}$ .

**Beneficial Mutations** Our goal is to predict the fate of mutations that may arise *de novo* in the viral population. Although most mutations will be deleterious, we note that the virus population grows by several orders of magnitude (possibly up to seven) during a single infection, and thus deleterious mutations should be effectively purged by selection. We therefore focus in this contribution on neutral mutations (no phenotypic effect), or rare mutations that confer an adaptive advantage to the virus. For a budding virus, changes in five life history traits can confer a selective advantage: a reduction in either the cell death rate,  $\tilde{D} = D - \Delta_D$ , or clearance rate,  $\tilde{C} = C - \Delta_C$ ; an increase in the attachment rate,  $\tilde{\alpha} = \alpha + \Delta_\alpha$ , or budding rate,  $\tilde{B} = B + \Delta_B$ ; or an increase in the rate at which cells mature and begin budding,  $\tilde{E} = E + \Delta_E$ .

To estimate the probability that a beneficial mutation ultimately survives, we substitute the parameters above for the analogous parameters in the pgf  $G(t, x_1, x_2, x_3)$  and numerically evaluate  $G(\tau, x_1, 1, 1)$ , which describes the distribution of free virions in the mutant lineage at time  $\tau$ , as described in the Appendix. We then compose this function with the pgf describing disease transmission. The accuracy of these numerical solutions was verified using an individual-based Monte Carlo simulation, developed for a reduced model without target cell limitation, similar to the approach described by PATWA and WAHL (2009).

**Selective Advantage** Finally, in order to compare the fitness of mutations affecting different traits, we calculate the selective advantage of each mutation. Following common experimental practice, we define fitness in terms of the doubling time, that is, we assume that in the time required for the founding population to double, the mutant lineage grows by a factor of  $2(1 + s)$ . Given the founding growth rate  $g$ , we substitute the founding doubling  $t = \ln(2)/g$  into  $2(1 + s) = \exp(\tilde{g}t)$  to find the selective advantage of the mutant,  $s = 2^{\bar{s}} - 1$ , where  $\bar{s} = \frac{\tilde{g}}{g} - 1$ . (For the relatively small  $s$  values presented here, this definition of the selective advantage differs from the more appropriate but less commonly used  $\bar{s}$  by a constant factor of  $\ln 2$ .)

To estimate the average growth rates,  $g$  and  $\tilde{g}$ , we consider a single cycle of growth, starting from a single free virus at time 0. In this case the partial derivative of  $G$  with respect to  $x_1$ , defined as  $Z = \partial G(\tau, 1, 1, 1)/\partial x_1$ , gives the expected number of free virions at time  $\tau$ , illustrated here for the case  $k = 1$  (GRIMMETT and WELSH 2014). The derivative was calculated numerically, and the average exponential growth rate of the free virus population is then given by  $g = \ln Z/\tau$ .

**Parameter values for influenza A virus** Parameter values were estimated where possible from the empirical and clinical literature for influenza A virus, and are displayed in Table 1. BEAUCHEMIN and HANDEL 2011 give a range of values for several relevant parameters, from which parameter

estimates for  $C$ ,  $D$ , and  $E$  were chosen. Specifically, we take the clearance time to be 3 hours, the cell death time 25 hours, and the eclipse time 6 hours (BACCAM *et al.* 2006; BEAUCHEMIN and HANDEL 2011).

Table 1: Parameter Estimates for Influenza A Virus

| Parameter    | Definition                               | Estimate                                                  |
|--------------|------------------------------------------|-----------------------------------------------------------|
| $\alpha$     | per target cell attachment rate          | $\frac{2.375 \times 10^{-9}}{\text{hour cell}}$           |
| $1/B$        | mean time between each budding event     | $\frac{19 \text{ hours}}{200 \text{ infectious virions}}$ |
| $1/C$        | mean clearance time                      | 3 hours                                                   |
| $1/D$        | mean cell death time                     | 25 hours                                                  |
| $1/E$        | mean eclipse time                        | 6 hours                                                   |
| $y_T(0)$     | initial number of target cells           | $4 \times 10^8$                                           |
| $v(0) = v_0$ | number of virions to initiate infection  | 100                                                       |
| $k$          | stages in eclipse phase                  | 30                                                        |
| $\mu$        | mutation rate (per site per replication) | $6.7 \times 10^{-7}$                                      |

To estimate the time between each budding event,  $1/B$ , we first consider the total number of virions produced per cell, the “burst size”. For influenza A virus, the burst size has been estimated to be between 1000-10000 virions (STRAY and AIR 2001). However, not all virions produced are infectious and in fact a large fraction are unable to infect a host cell; the particle to infectivity ratio for influenza A is approximately 50:1 (MARTIN and HELENIUS 1991; ROY *et al.* 2000). Taking the upper bound of the range for burst size, of the 10000 virions produced only 200 are predicted to be infectious. Recall that budding does not kill the host cell, therefore budding time depends on the eclipse and cell death times. An eclipse time of 6 hours and a cell death time of 25 hours gives a budding time of 19 hours. Therefore, the time between each infectious budding event,  $1/B$ , is assumed to be assumed to be 19/200 hours per infectious virion.

The number of upper respiratory epithelial cells in a healthy adult is estimated to be  $4 \times 10^8$

(BACCAM *et al.* 2006). Consistent with the complete desquamation of the epithelium observed in 195  
murine influenza (RAMPHAL *et al.* 1979), we therefore take  $y_T(0) = 4 \times 10^8$ . In the supplementary 196  
material we investigate the sensitivity of our main results to this value. Similarly, we assume that 197  
an infection is founded by  $v_0 = 100$  virions, consistent with recent sequencing of donor-recipient 198  
pairs (POON *et al.* 2016). However since values of 10-200 have been suggested in the literature 199  
(MCCAW *et al.* 2011; VARBLE *et al.* 2014; PECK *et al.* 2015), we will also demonstrate results over 200  
a range of  $v_0$  values. 201

To allow for realistically distributed eclipse times, we assume a gamma-distributed eclipse phase by 202  
including a sequence of  $k$  infected stages before the budding stage. As described above, the mean 203  
eclipse time,  $1/E$ , is set to 6 hours. The variance of the eclipse period of influenza A can then be 204  
used to estimate  $k$ . PINILLA *et al.* (2012) used a best-fit analysis for kinetic parameters of influenza 205  
A to predict a mean eclipse time of 6.6 hours, with an eclipse period standard deviation,  $\sigma$ , of 1.2 206  
hours. Since the standard deviation for a gamma distribution with mean  $m$  is given by  $\sigma = m/\sqrt{k}$ , 207  
these values suggest that a realistic value of  $k$  is approximately 30. 208

We fix the attachment rate,  $\alpha$ , such that that the peak of the free viral load occurs within the 209  
reported range for influenza A of 48 to 72 hours post-infection (WRIGHT *et al.* 2001; LAU *et al.* 210  
2010). The attachment rate  $\alpha = 2.375 \times 10^{-9}$  per hour per cell provided in Table 1 yields a peak time 211  
of  $\tau = 54.5$  hours, and implies a mean attachment time,  $1/A(0)$ , of just over one hour when target 212  
cells are plentiful. We assume that disease transmission is most likely at the peak viral shedding 213  
time, and thus study a transmission event that occurs at this peak time,  $\tau$ . Note that when we 214  
examine the sensitivity of the model, for example when changing  $v_0$ , we leave the attachment rate 215  
 $\alpha$  fixed. We recompute the time course  $v(t)$  and assume that the transmission event occurs at the 216  
peak value of  $v(t)$ . The transmission time,  $\tau$ , then differs slightly between cases. In no case was  $\tau$  217  
outside the empirically estimated range of 48-72 hours. 218

The probability that each free virion survives the bottleneck and is transmitted to the next susceptible individual is defined as  $F$ . This probability is calculated by using the peak number of free virions,  $v(\tau)$ , found by numerically solving model 2. As only free virions contribute to the infectious dose, the fraction of free virions surviving the bottleneck is  $F = v_0/v(\tau)$ , where again  $v_0$  is the founding population size for the next infected individual.

The mutation rate for influenza A, per nucleotide per replication, has been estimated as  $\mu = 2 \times 10^{-6}$  (NOBUSAWA and SATO 2006). This estimate was obtained for the IAV nonstructural gene during plaque growth, and thus does not include lethal mutations. Neglecting differences in transition and transversion rates, we divide this value by three to estimate the rate at which a specific, non-lethal nucleotide substitution occurs. We investigate the sensitivity of our results to this parameter as well.

**Data Availability** The authors affirm that all data necessary for confirming the conclusions of this article are represented fully within the article and its tables and figures.

## RESULTS

Figure 1 illustrates the deterministic dynamics of System 2, showing the time course of the host influenza A infection. The free virus peaks at 54.5 hours, just after the peak in the mature (budding) cell population. Note that in this simplified model, the availability of target cells limits the infection. As described earlier, this model is only accurate while the adaptive immune response remains negligible; although we illustrate the full seven days of infection, we use only the first 54.5 hours in the subsequent analysis.

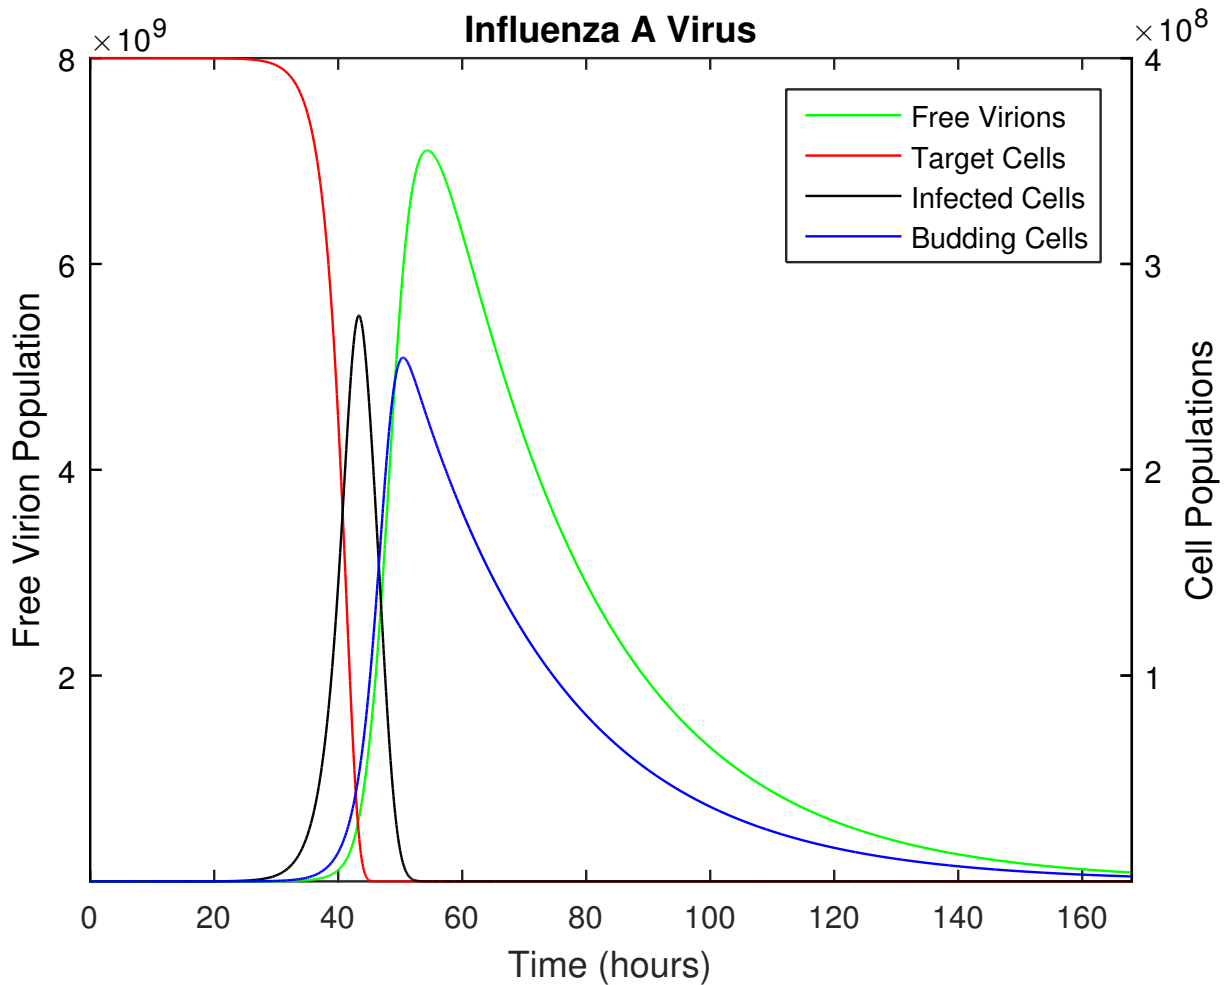

Figure 1: The time course of influenza A infection over the span of a week (168 hours). Parameter values are provided in Table 1, with the following initial conditions:  $4 \times 10^8$  epithelial cells (target cells), 100 virions (initial infection dose), all other populations initially zero.

Figure 2 shows what we will refer to as the *mutation transmission rate*, that is, the probability 239  
that at least one copy of a specific mutation arises *de novo* during an infection time course, survives 240  
genetic drift and is successfully transmitted to the subsequent host. Model predictions for beneficial 241  
mutations affecting each life history trait are shown versus the selective coefficient,  $s$ ; the intercept 242  
at  $s = 0$  shows the prediction for neutral mutations. Here we have assumed for comparison that 243  
the baseline mutation rate is equal for all types of mutation, however the  $y$ -axis in Figure 2 scales 244  
approximately linearly with  $\mu$ . In the Supplementary Material, we illustrate results for a wide range 245  
of mutation rates. 246

To interpret these results, the empirical mutation rate must be carefully considered. The rate estimate we use reflects the probability, per replication, that a specific substitution occurs at a specific nucleotide in the influenza A sequence, given that the substitution is non-lethal. Thus for example if the substitution of interest is neutral or effectively neutral, the model predicts that this substitution would occur *de novo* in the donor and be transmitted to a recipient about once in every 2000 transmission events. If the substitution of interest confers a selective advantage, the mutation transmission rate would be higher. Clearly, a large fraction of viable mutations will be deleterious and would be outcompeted before transmission; this would correspond to a lower overall mutation rate as examined in the Supplementary Material and outlined further in the Discussion.

The most striking result of Figure 2 is the predicted evolvability of influenza A during a single transmission cycle. The mutation transmission rate of one in two thousand, per substitution per site, may contribute substantial diversity since the influenza A genome is a sequence of over 13,000 nucleotides with three possible substitutions per site. We will return to the interpretation and implications of this prediction in the Discussion.

The near-overlapping lines in Figure 2 indicate that the mutation transmission rate does not vary widely across life history traits, and also illustrates the maximum selective advantage made possible by improvements to each trait. For example, clearance and cell death rates can only be reduced to zero, limiting the range of  $s$  for these traits. Although there is no upper bound on the rates of attachment or maturation to budding (eclipse rate), once these rates are effectively instantaneous, further increases do not appreciably change the growth rate, and so higher  $s$  values are also inaccessible for these traits. Similarly, increases to the budding rate cannot improve the growth rate without bound, due to target cell limitation.

Results in Figure 2 assume the default parameter set (Table 1); in particular, 100 virions are chosen at random from the free virus population and transmitted to the new host. In Figure 3, we fix the

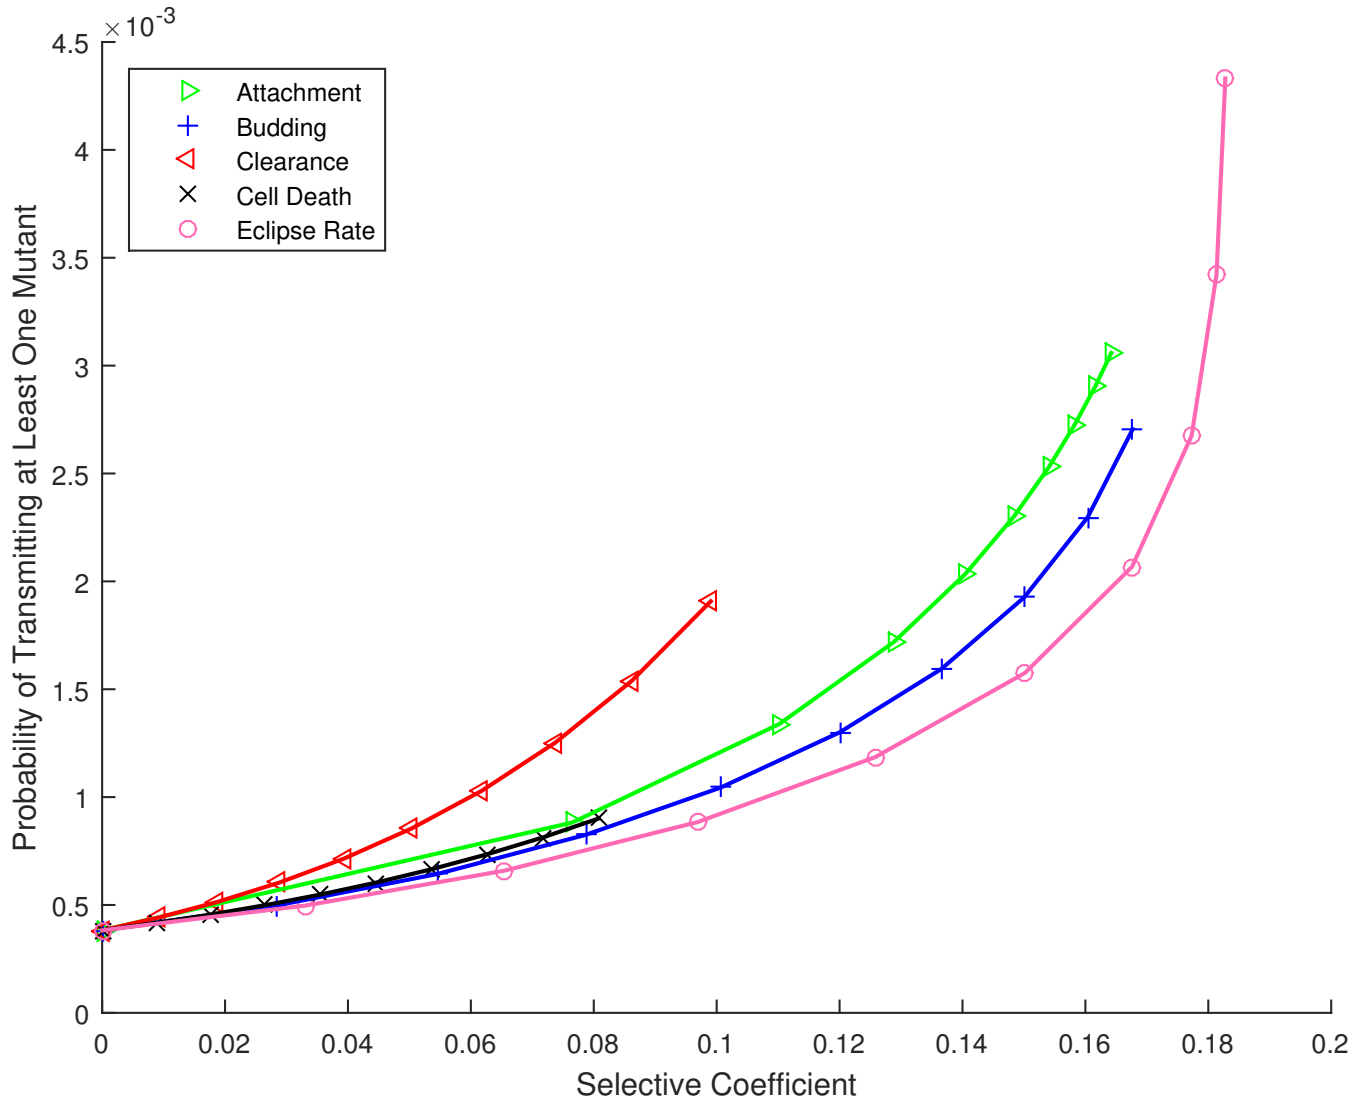

Figure 2: Probability that at least one *de novo* mutation arises during the infection time course and is passed to the next host, for mutations affecting the life history of influenza A virus, versus their selective coefficient. Parameters as provided in Table 1.

selective coefficient ( $s = 0.05$ ) but vary the size of this transmission bottleneck. We find that the 271  
mutation transmission rate increases roughly linearly with bottleneck size. 272

The results above compare mutations that have equivalent effects on the overall growth rate of the 273  
virus, assuming that the underlying mutation rate is the same for all mutations. Although the 274  
question of mutational accessibility is beyond our focus, some sense of the degree to which these 275  
mutations might be physiologically achievable can be obtained by considering the relative changes 276



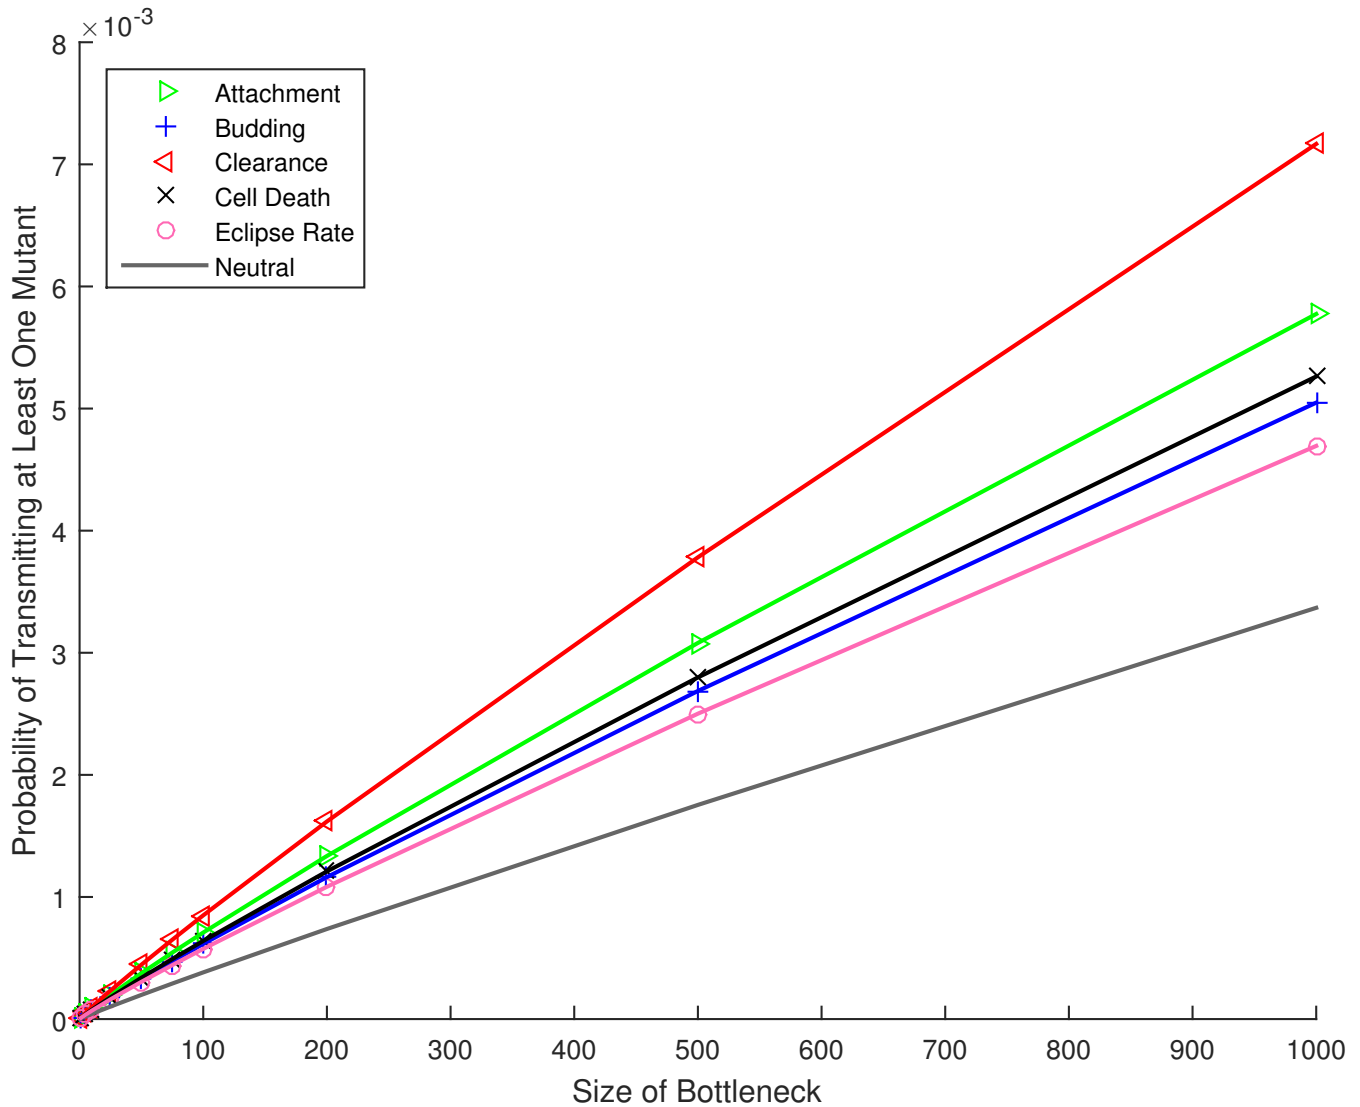

Figure 3: Probability that at least one *de novo* mutation arises during the infection time course and is passed to the next host, for mutations affecting the life history of influenza A virus, versus the number of virions in the transmission bottleneck. All mutations have a selective advantage of  $s = 0.05$ , except for the curve marked “neutral”, for which  $s = 0$ . Other parameters as provided in Table 1.

required to the trait value. To this end, Figure 4 shows the relative change in each life history 277  
parameter necessary to achieve a specific increase in growth rate (selective coefficient). To incur an 278  
advantage of  $s = 0.08$ , for example, requires less than a 10% change in the rate at which cells leave 279  
the eclipse phase and begin budding; in contrast the attachment rate would need to double (change 280  
by over 100%) to achieve the same selective advantage. Note again that clearance and cell death 281  
rates can only be reduced by at most 100%, limiting the range of their possible effects. For the 282

other three traits, as described previously, beneficial mutations can produce selection coefficients 283  
in the approximate range  $0 < s < 0.2$ , but further rate increases produce diminishing returns and 284  
fitness saturates. 285

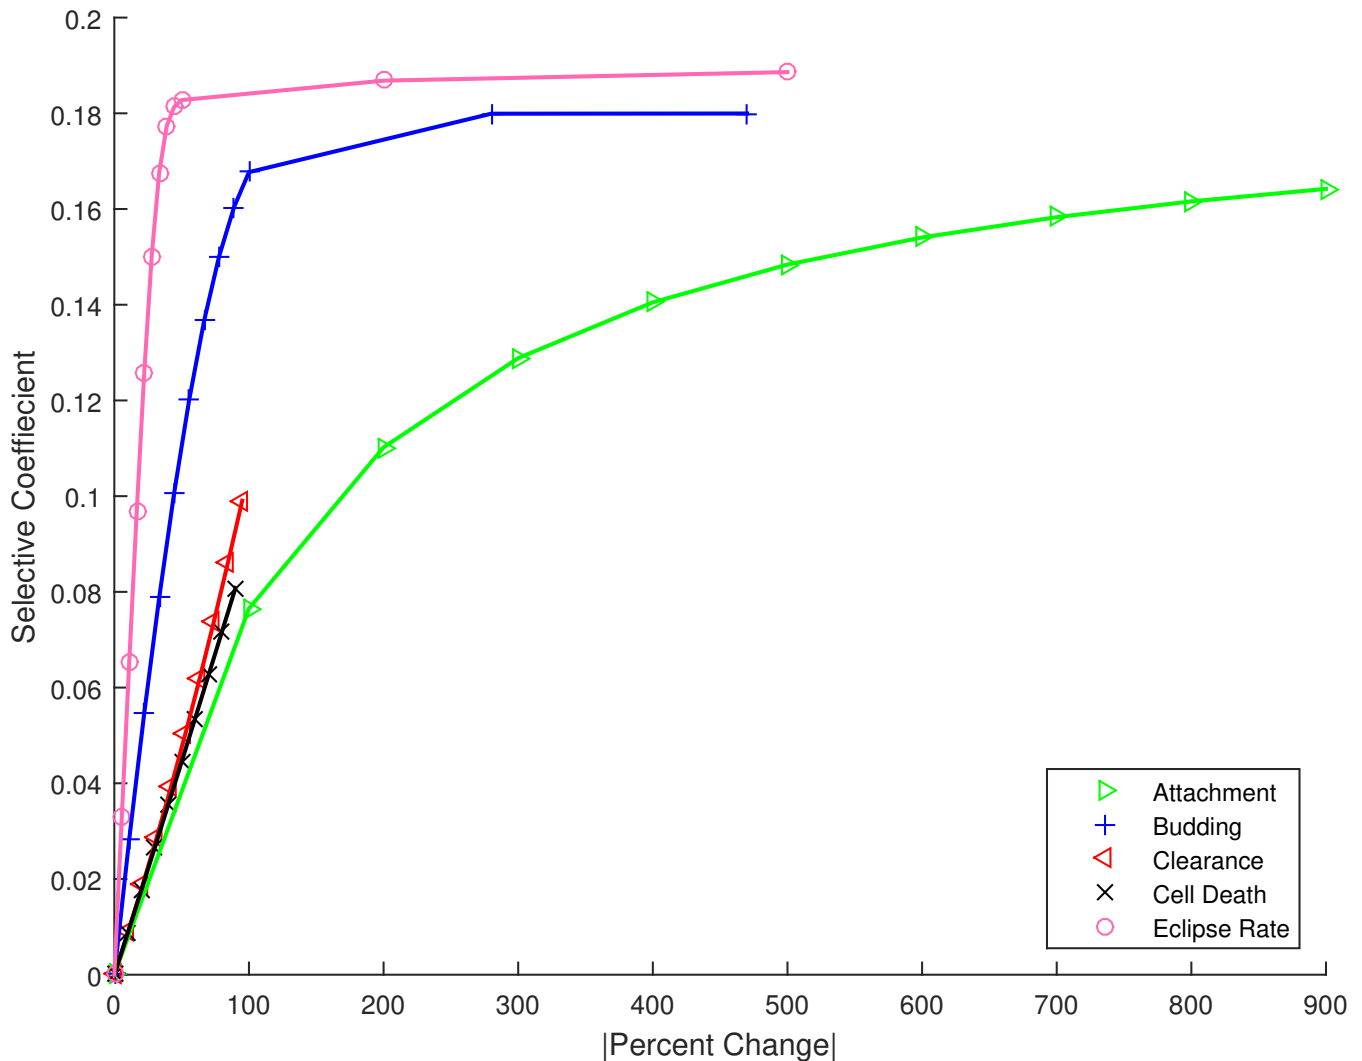

Figure 4: The change in selective coefficient achieved by a given absolute percent change in trait value, for mutations affecting the five life-history traits. For example, large changes in attachment rate would be required to achieve the same advantage as relatively small changes in eclipse timing.

Figure 2 gives the overall probability that a *de novo* mutation is generated and passed on. As 286  
described in the Methods, this value reflects the integrated probability of occurrence and survival for 287  
mutations that could first occur at any time during the infection time course. To better understand 288  
the dynamics of this process, in Figure 5 we show the predicted survival probability, the probability 289  
that the mutation survives and is transmitted to the next host, for mutations that arise at time 290

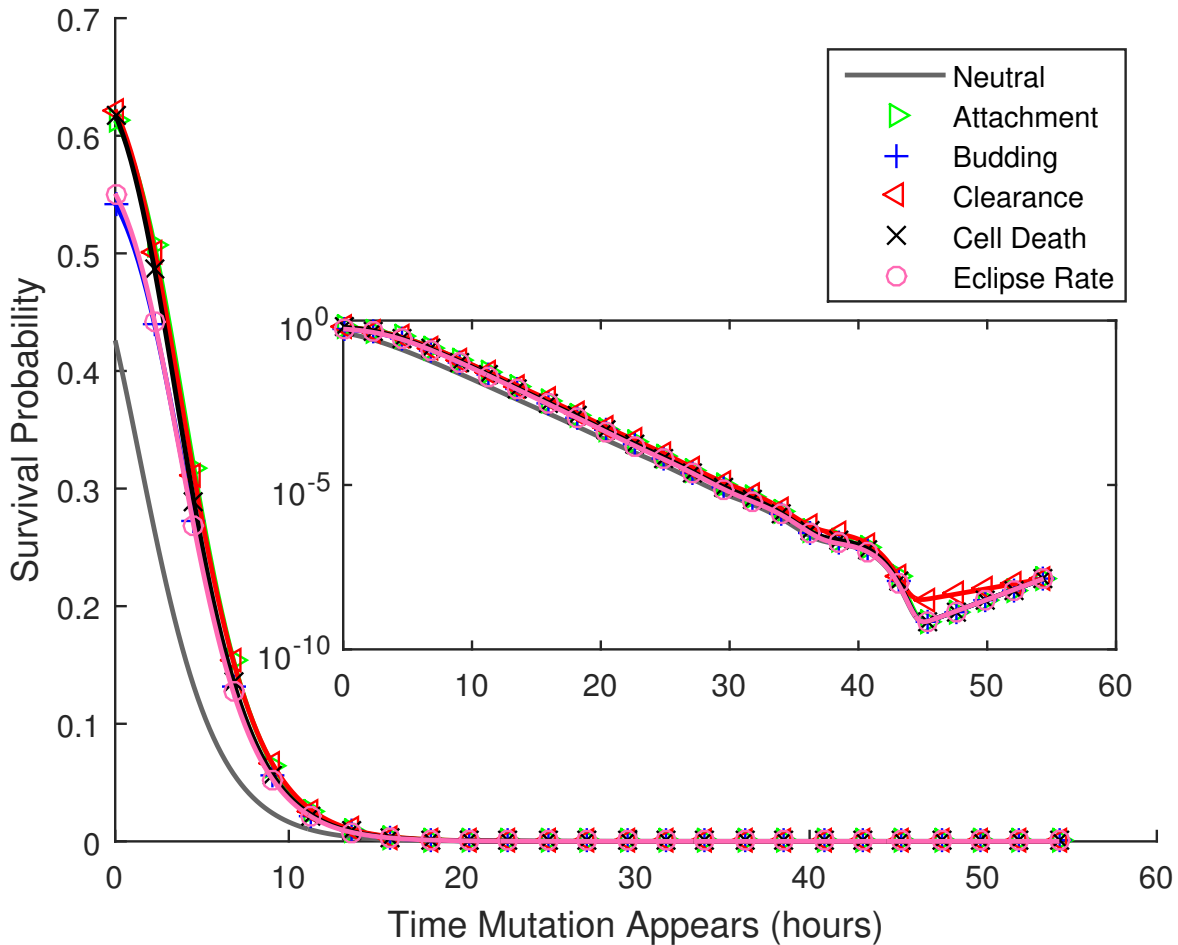

Figure 5: Given that a *de novo* mutation first occurs at time  $t_0$  after the start of the infection, the probability that at least one copy of it is transmitted to the next host, versus  $t_0$ . All mutations have a selective advantage of  $s = 0.05$ , except for the curve marked “neutral”, for which  $s = 0$ . Parameters as provided in Table 1. The inset shows the same results with in a semilog plot.

$t_0$  during the infection time course. Despite the fact that transmission to the next host occurs at 54.5 hours, the figure gives the impression that mutations that arise after about the first 10 hours of infection have little chance of survival.

The results in Figure 5 are mitigated, however, by the fact that many more replication events occur later during the growth phase. To investigate the rate at which surviving mutations (mutations that are transferred to the next host) first occur, we consider the product of the transmission probability for mutations that arise at each time and the number of new virions produced at that time,  $By_B(t_0)$ .

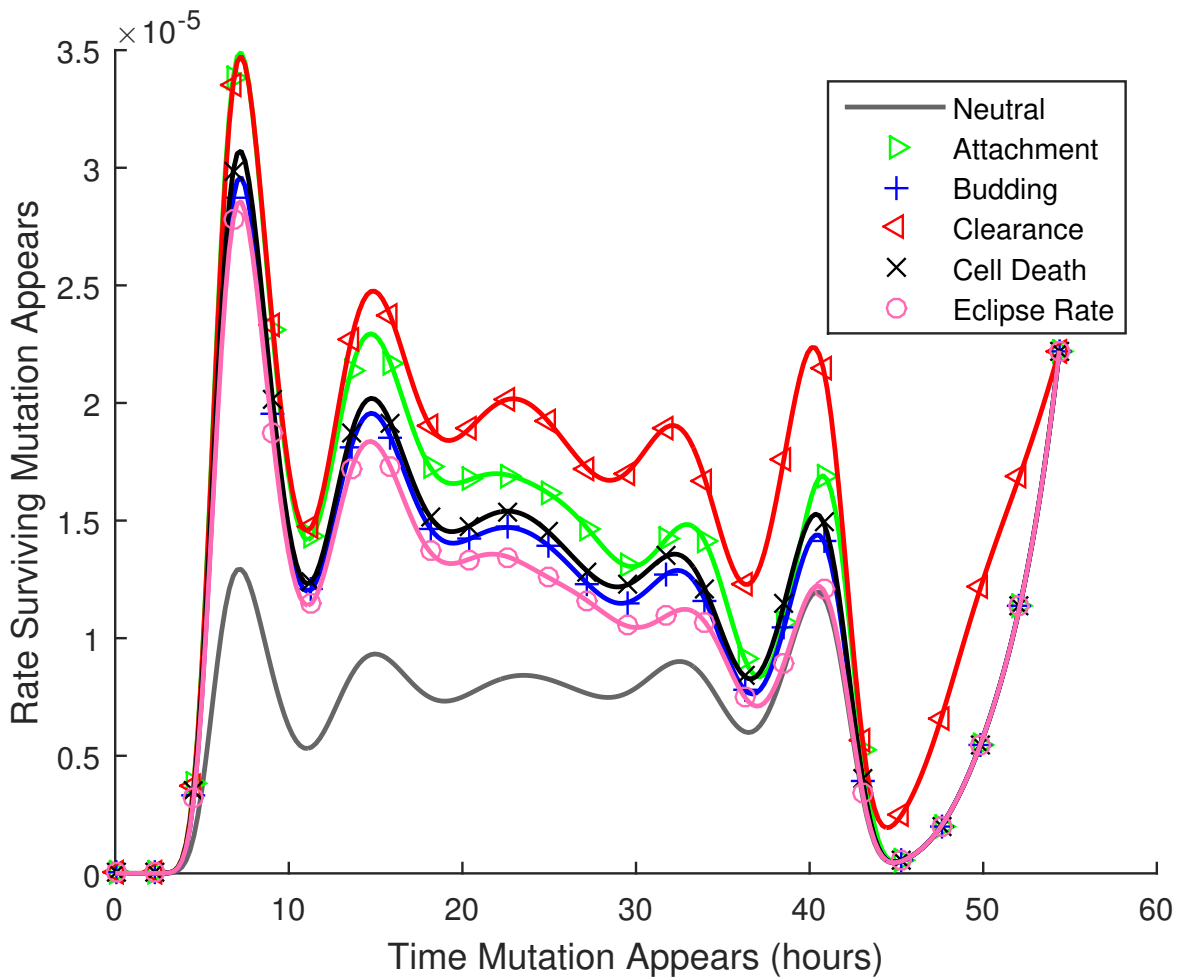

Figure 6: The rate at which transmitted mutations appear, versus the time at which they first appear. For this figure, the probabilities of being passed on to the next host illustrated in Figure 5 are multiplied by the number of new virions produced at each time,  $\mu B y_B(t_0)$  from Equation 2. Thus the figure illustrates the relative numbers of ultimately transmitted mutations that occur at each time during the infection time course.

Figure 6 shows these results. The model predicts that transmitted mutations occur throughout the 298  
infection time course, except during the first few hours of infection, when very few new virions are 299  
produced, and for a brief window approximately 10 hours before the transmission event. The latter 300  
effect presumably occurs because virions produced in this window are unlikely to be free at the time 301  
of transmission (infected cells are not transmitted). The oscillations in these curves occur because 302  
the founder virions start synchronously at  $t = 0$  as free virions, and must attach and complete the 303  
eclipse phase before new virions can be produced. 304

## DISCUSSION

305

We develop a model of within-host pathogen evolution, and use this to predict the fate of *de* 306  
*novo* mutations that occur during disease transmission cycles. Using parameter values specific to 307  
influenza A virus and an estimate of the non-lethal mutation rate for IAV, our results predict that 308  
the probability that at least one copy of a *de novo* nucleotide substitution is transmitted to the 309  
subsequent host is about  $5 \times 10^{-4}$  per substitution per site, assuming the mutation is either neutral 310  
or beneficial. Multiplying by three possible nucleotide changes and the  $\approx 13,600$  sites in the IAV 311  
genome yields an estimate that as many as 20 sites in the founding dose for the recipient may contain 312  
substitutions that occurred *de novo* in the donor. This upper bound, however, must be corrected by 313  
the fraction of non-lethal mutations that are either neutral or beneficial. If approximately half of all 314  
non-lethal mutations are neutral or beneficial, as reported for another single-stranded RNA animal 315  
virus with a similar genome size (SANJUÁN *et al.* 2004), we predict each recipient founding dose will 316  
contain about ten *de novo* substitutions. If the fraction of neutral or beneficial mutations, among 317  
non-lethal mutations, is closer to 10% (see EYRE-WALKER and KEIGHTLEY (2007) for review), 318  
we predict about two new substitutions per transmission. As demonstrated in Figures S2 and S7, 319  
these estimates scale directly with the underlying mutation rate and the size of the transmission 320  
bottleneck. Despite this inherent uncertainty, our results predict that a small handful of mutations 321  
occurring *de novo* in the donor will be transmitted to each recipient of IAV. 322

Our approach makes the simplifying assumption that the founding infectious dose in the donor is 323  
phenotypically, but not genetically uniform. Thus the predicted *de novo* mutations may occur on 324  
different genetic backgrounds circulating within the donor. Recent evidence suggests that multiple 325  
lineages are transmitted between donor-recipient pairs in IAV (POON *et al.* 2016), and it seems 326  
unlikely that all transmitted lineages would be phenotypically identical. Thus a clear direction for 327  
future work would be to expand our approach to track multiple distinct lineages within the host, 328  
and predict the fates of mutations occurring on these backgrounds. 329

We can also take our estimate of ( $1.5 \times 10^{-3}$  non-lethal substitutions per site per transmission 330  
event) $\times$ (10-50% neutral or beneficial) to predict  $1.5 - 7.5 \times 10^{-4}$  substitutions per site per trans- 331  
mission event. These values are consistent with the observed evolutionary rate of IAV throughout a 332  
seasonal epidemic,  $2 \times 10^{-3}$  substitutions per site per year in the nonstructural (NS) gene (KAWAOKA 333  
*et al.* 1998), if the chain of influenza transmission typically involves 3 to 13 transmission events per 334  
season. 335

Although transmission bottlenecks in IAV, as in many other pathogens, can be extremely severe, 336  
our results are consistent with previous work demonstrating that the period of growth between 337  
population bottlenecks has an even greater impact (WAHL *et al.* 2002); this period of sustained 338  
population expansion promotes the survival of new mutations, as seen more generally in any growing 339  
population (OTTO and WHITLOCK 1997). The rapid growth of influenza during early infection, 340  
from a relatively small infectious dose to peak viral loads many orders of magnitude larger, implies 341  
that neutral substitutions, or mutations conferring even a small benefit, will have ample opportunity 342  
to compete with founder strains. This further implies that the life history of influenza A should 343  
be well adapted to the disease transmission cycle in humans, in other words, selection has the 344  
opportunity to rapidly fine-tune the life histories of pathogens experiencing extreme transmission 345  
bottlenecks. 346

This result is consistent with previous theoretical (BERGSTROM *et al.* 1999) and experimental work 347  
on viral evolution (DUARTE *et al.* 1992; DUARTE *et al.* 1993; NOVELLA *et al.* 1995; NOVELLA *et al.* 348  
1996). The latter work focused on the loss of fitness due to population bottlenecks, but fitness 349  
could be maintained or improved when the bottleneck size was as large as five or ten individuals 350  
(NOVELLA *et al.* 1996). Similarly, BERGSTROM *et al.* 1999 predicted that viral pathogens would 351  
be well-adapted if the bottleneck size is large (or order five or ten), and the number of generations 352  
between bottlenecks is large (of order 25 or 50). The parameter values we explored for influenza 353  
A correspond to over 25 population doublings between transmission events, with bottleneck sizes 354  
of 10 to 200, and are thus consistent with a parameter regime in which the pathogen is able to 355

improve or maintain fitness.

356

The use of a specific life-history model imposes natural limits on the growth rate and thus the selective advantage that can be achieved by budding viruses. For the parameters specific to influenza A, changes to the clearance rate of the free virus or death rate of infected cells could only achieve a selective advantage of  $s < 0.1$ . This occurs mathematically because these rates cannot be reduced below zero; it follows intuitively because even if infected cells or virus never die or lose infectivity, growth remains limited by other processes. Mutations with larger beneficial effects, in the range  $0.1 < s < 0.2$ , are accessible only by reducing the eclipse phase, or through very large magnitude changes to the attachment or budding rates. Given that predicted differences in survival probability for the different traits are rather modest (Figure 5), these results suggest that small magnitude changes in the eclipse timing of influenza A will be subject to selective pressure. The limits we observe in the achievable growth rate suggest that larger effect beneficial mutations in influenza A are not only unlikely, they may not be physically possible given the life history of this virus.

357  
358  
359  
360  
361  
362  
363  
364  
365  
366  
367  
368

We have focused this study on the in-host life history of the virus. In principle, however, a beneficial mutation could also affect the transmissibility of the lineage (parameter  $F$ ), producing virions that are preferentially transferred to a new host (HANDEL and BENNETT 2008). This would be distinct from mutations that increase viral load; mutations affecting  $F$  would increase the probability that an individual viral particle is transmitted, for example by prolonging the stability of the virion in the external environment.

369  
370  
371  
372  
373  
374

These results explore mutations affecting a single trait in isolation. Clearly higher fitness could be achieved by mutations that affect several traits, if beneficial pleiotropic mutations are available. Previous work suggests that the survival probability of pleiotropic mutations typically falls between the predictions obtained for single-trait mutations of equivalent selective effect (WAHL and ZHU 2015). In addition, we have investigated the transmission of *de novo* mutations when rare. Given the

375  
376  
377  
378  
379

magnitude of the viral loads measured in influenza A, it is clear that multiple beneficial mutations 380  
could emerge and compete before the virus is transmitted to a new host. Thus we would expect 381  
that clonal interference and multiple mutation dynamics might come into play in describing the 382  
adaptive trajectory more fully (DESAI and FISHER 2007; DESAI *et al.* 2007). 383

A limitation of the model is that the immune response is not explicitly included as a dynamic 384  
variable. Innate immunity is activated when an infection is detected, which is usually within the 385  
first few hours of infection. Adaptive immunity, however, is activated, at the earliest, three days 386  
post-infection (TAMURA and KURATA 2004). Since our model addresses early infection (up to 54.5 387  
hours post-infection) adaptive immune effects are assumed negligible. The innate immune response, 388  
however, cannot be neglected, as its main purpose is to limit viral replication (VAN DE SANDT *et al.* 389  
2012). In our approach, innate immune mechanisms are included in the viral clearance and infected 390  
cell death rates, but are assumed to be constant throughout this early stage of the infection. This 391  
phenomenon has been reviewed in some detail in previous work (SMITH and PERELSON 2011; 392  
BOIANELLI *et al.* 2015; BACCAM *et al.* 2006; BEAUCHEMIN and HANDEL 2011), from which it is 393  
clear that directly incorporating the immune response is necessary for an accurate representation 394  
of the full time course of infection (BOIANELLI *et al.* 2015). Even when limiting our attention to 395  
early infection only, interferon-I and natural killer cells could be included to more accurately model 396  
innate immunity (BOIANELLI *et al.* 2015). However, the complexity of the immune system creates 397  
a significant challenge in accurately modeling influenza A dynamics, even during this initial time 398  
period (BOIANELLI *et al.* 2015). In particular, many key parameters of immune kinetics remain 399  
unquantified, creating additional uncertainty (DOBROVOLNY *et al.* 2013). 400

Finally, it is well understood that antigenic drift is associated with the evolution of influenza A virus 401  
(CARRAT and FLAHAULT 2007). Antigenic drift would be formalized in our model as a reduction in 402  
the death rate of infected cells or the clearance rate of free virions, as these life history parameters 403  
would be improved by any immune evasion. In fact, Figure 2 predicts that for mutations with 404  
small selective effects ( $s < 0.08$ ), of all possible mutations with the same selective effect, clearance 405



mutations are the most likely to survive when rare. Thus mutations affecting the viral clearance 406  
rate are most likely to adapt. This could shed light on the mechanisms underlying the maintenance 407  
of antigenic drift, however much remains to be understood about the complex transmission and 408  
evolutionary dynamics of influenza A virus. It is our hope that predicting the fate of *de novo* 409  
mutations affecting IAV life history is an important piece of this interesting puzzle. 410

## ACKNOWLEDGMENTS 411

J.N.S.R. was funded by the Ontario Graduate Scholarship (OGS). L.M.W. is funded by the Natural 412  
Sciences and Engineering Research Council of Canada (NSERC). We thank Catherine Beauchemin 413  
for a number of insightful and helpful comments. 414

## LITERATURE CITED 415

- ABEL, S., P. A. ZUR WIESCH, B. DAVIS, and M. WALDOR, 2015 Analysis of bottlenecks in 416  
experimental models of infection. *PLOS Pathogens* 11(6): e1004823. 417
- ALEXANDER, H. and T. DAY, 2010 Risk factors for the evolutionary emergence of pathogens. *J.* 418  
*R. Soc. Interface* 7(51): 1455–1474. 419
- ALEXANDER, H. and L. WAHL, 2008 Fixation probabilities depend on life history: fecundity, 420  
generation time and survival in a burst-death model. *Evolution* 62(7): 1600–1609. 421
- ALIZON, S., A. HURFURD, N. MIDEO, and M. VAN BAALEN, 2009 Virulence evolution and 422  
the trade-off hypothesis: history, current state of affairs and the future. *J. Evol. Biol.* 22(2): 423  
245–259. 424
- ANTIA, R., R. REGOES, J. KOELLA, and C. BERGSTROM, 2003 The role of evolution in the 425  
emergence of infectious diseases. *Nature* 426: 658–661. 426

- BACCAM, P., C. BEAUCHEMIN, C. A. MACKEN, F. G. HAYDEN, and A. S. PERELSON, 2006 427  
Kinetics of influenza A virus infection in humans. *Journal of virology* *80*(15): 7590–7599. 428
- BEAUCHEMIN, C. and A. HANDEL, 2011 429  
A review of mathematical models of influenza A infections 429  
within a host or cell culture: lessons learned and challenges ahead. *BMC Public Health* *11*(Suppl 430  
1): S7. 431
- BEAUCHEMIN, C., J. SAMUEL, and J. TUSZYNSKI, 2005 432  
A simple cellular automaton model for 432  
influenza A viral infections. *Journal of Theoretical Biology* *232*(2): 223–234. 433
- BERGSTROM, C. T., P. MCELHANY, and L. A. REAL, 1999 434  
Transmission bottlenecks as de- 434  
terminants of virulence in rapidly evolving pathogens. *Proceedings of the National Academy of 435  
Sciences of the United States of America* **96**: 5095–5100. 436
- BIGGERSTAFF, M., S. CAUCHEMEZ, C. REED, M. GAMBHIR, and L. FINELLI, 2014 437  
Estimates 437  
of the reproduction number for seasonal, pandemic, and zoonotic influenza: a systematic review 438  
of the literature. *BMC infectious diseases* *14*(1): 1. 439
- BOCHAROV, G. and A. ROMANYUKHA, 1994 440  
Mathematical model of antiviral immune response 440  
III. Influenza A virus infection. *Journal of Theoretical Biology* *167*(4): 323–360. 441
- BOIANELLI, A., V. K. NGUYEN, T. EBENSEN, K. SCHULZE, E. WILK, N. SHARMA, 442  
S. STEGEMANN-KONISZEWSKI, D. BRUDER, F. R. TOAPANTA, C. A. GUZMÁN, and OTHERS, 443  
2015 443  
Modeling Influenza Virus Infection: A Roadmap for Influenza Research. *Viruses* *7*(10): 444  
5274–5304. 445
- BOUVIER, N. M. and P. PALESE, 2008 446  
The biology of influenza viruses. *Vaccine* **26**: D49–D53. 446
- BURCH, C. L. and L. CHAO, 1999 447  
Evolution by small steps and rugged landscapes in the RNA 447  
virus phi6. *Genetics* **151**: 921–927. 448
- CARRAT, F. and A. FLAHAULT, 2007 449  
Influenza vaccine: the challenge of antigenic drift. *Vac- 449  
cine* *25*(39): 6852–6862. 450
- CHOWELL, G., M. MILLER, and C. VIBOUD, 2008 451  
Seasonal influenza in the United States, France, 451  
and Australia: transmission and prospects for control. *Epidemiology and infection* *136*(06): 852– 452  
864. 453

- COOMBS, D., M. GILCHRIST, and C. BALL, 2007 Evaluating the importance of within- and 454  
between-host selection pressures on the evolution of chronic pathogens. *Theor. Popul. Biol.* **72**: 455  
576–591. 456
- DAY, T., S. ALIZON, and N. MIDEO, 2011 Bridging scales in the evolution of infectious disease 457  
life histories: theory. *Evolution* **65**: 3448–3461. 458
- DESAI, M. M. and D. S. FISHER, 2007 Beneficial mutation–selection balance and the effect of 459  
linkage on positive selection. *Genetics* *176*(3): 1759–1798. 460
- DESAI, M. M., D. S. FISHER, and A. W. MURRAY, 2007 The speed of evolution and maintenance 461  
of variation in asexual populations. *Current biology* *17*(5): 385–394. 462
- DOBROVOLNY, H. M., M. B. REDDY, M. A. KAMAL, C. R. RAYNER, and C. A. BEAUCHEMIN, 463  
2013 Assessing mathematical models of influenza infections using features of the immune re- 464  
sponse. *PloS one* *8*(2): e57088. 465
- DUARTE, E., D. CLARKE, A. MOYA, E. DOMINGO, and J. HOLLAND, 1992 Rapid fitness losses 466  
in mammalian RNA virus clones due to Muller’s ratchet. *Proceedings of the National Academy* 467  
*of Sciences of the United States of America* **89**: 6015–6019. 468
- DUARTE, E. A., D. K. CLARKE, A. MOYA, S. F. ELENA, E. DOMINGO, and J. HOLLAND, 469  
1993 Many-trillionfold amplification of single RNA virus particles fails to overcome the Muller’s 470  
ratchet effect. *Journal of Virology* **67**: 3620–3623. 471
- ELENA, S. F., R. SANJUÁN, A. V. BORDERÍA, and P. E. TURNER, 2001 Transmission bottlenecks 472  
and the evolution of fitness in rapidly evolving RNA viruses. *Infection, Genetics and Evolution* **1**: 473  
41–48. 474
- EYRE-WALKER, A. and P. D. KEIGHTLEY, 2007 The distribution of fitness effects of new muta- 475  
tions. *Nature Reviews Genetics* *8*(8): 610–618. 476
- FENG, Z., S. TOWERS, and Y. YANG, 2011 Modeling the effects of vaccination and treatment on 477  
pandemic influenza. *The AAPS journal* *13*(3): 427–437. 478
- GANDON, S., M. E. HOCHBERG, R. D. HOLT, and T. DAY, 2012 What limits the evolutionary 479  
emergence of pathogens? *Phil. Trans. R. Soc. Lond. B* *368*(1610): 20120086. 480

- GAROFF, H., R. HEWSON, and D.-J. E. OPSTELTEN, 1998 Virus maturation by budding. *Microbiology and Molecular Biology Reviews* **62**(4): 1171–1190. 481
- GILCHRIST, M. and A. SASAKI, 2002 Modeling host-parasite coevolution: a nested approach 483  
based on mechanistic models. *J. Theor. Biol.* **218**: 289–308. 484
- GRIMMETT, G. and D. WELSH, 2014 *Probability: an introduction*. Oxford University Press, USA. 485
- HANDEL, A. and M. R. BENNETT, 2008 Surviving the bottleneck: transmission mutants and of 486  
microbial populations. *Genetics* **180**(4): 2193–2200. 487
- IWASA, Y., F. MICHOR, and M. NOWAK, 2003 Evolutionary dynamics of escape from biomedical 488  
intervention. *Proc. R. Soc. Lond. B* **270**: 2573–2578. 489
- KAWAOKA, Y., O. T. GORMAN, T. ITO, K. WELLS, R. O. DONIS, M. R. CASTRUCCI, I. DO- 490  
NATELLI, and R. G. WEBSTER, 1998 Influence of host species on the evolution of the non- 491  
structural (NS) gene of influenza A viruses. *Virus Research* **55**(2): 143–156. 492
- LACHAPELLE, J., J. REID, and N. COLEGRAVE, 2015 Repeatability of adaptation in experimental 493  
populations of different sizes. *Proc. R. Soc. Lond. B* **282**(1805): 20143033. 494
- LARSON, E. W., J. W. DOMINIK, A. H. ROWBERG, and G. A. HIGBEE, 1976 Influenza virus 495  
population dynamics in the respiratory tract of experimentally infected mice. *Infection and* 496  
*immunity* **13**(2): 438–447. 497
- LAU, L. L., B. J. COWLING, V. J. FANG, K.-H. CHAN, E. H. LAU, M. LIPSITCH, C. K. CHENG, 498  
P. M. HOUCK, T. M. UYEKI, J. M. PEIRIS, and OTHERS, 2010 Viral shedding and clinical 499  
illness in naturally acquired influenza virus infections. *Journal of Infectious Diseases* **201**(10): 500  
1509–1516. 501
- MARTIN, K. and A. HELENIUS, 1991 Transport of incoming influenza virus nucleocapsids into the 502  
nucleus. *Journal of virology* **65**(1): 232–244. 503
- MCCAW, J. M., N. ARINAMINPATHY, A. C. HURT, J. MCVERNON, and A. R. MCLEAN, 2011 504  
A mathematical framework for estimating pathogen transmission fitness and inoculum size using 505  
data from a competitive mixtures animal model. *PLoS Comput Biol* **7**(4): e1002026. 506

- MIDEO, N., S. ALIZON, and T. DAY, 2008 Linking within- and between-host dynamics in the evolutionary epidemiology of infectious diseases. *Trends in Ecol. Evol.* **23**: 511–517.
- NOBUSAWA, E. and K. SATO, 2006 Comparison of the mutation rates of human influenza A and B viruses. *Journal of Virology* *80*(7): 3675–3678.
- NOVELLA, I. S., S. F. ELENA, A. MOYA, E. DOMINGO, and J. J. HOLLAND, 1995 Size of genetic bottlenecks leading to virus fitness loss is determined by mean initial population fitness. *Journal of Virology* **69**: 2869–2872.
- NOVELLA, I. S., S. F. ELENA, A. MOYA, E. DOMINGO, and J. J. HOLLAND, 1996 Repeated transfer of small RNA virus populations leading to balanced fitness with infrequent stochastic drift. *Mol Gen Genet* **252**: 733–738.
- OTTO, S. P. and M. C. WHITLOCK, 1997 The probability of fixation in populations of changing size. *Genetics* *146*(2): 723–733.
- PATWA, Z. and L. WAHL, 2008 Fixation probabilities for lytic viruses: the attachment-lysis model. *Genetics* **180**: 459–470.
- PATWA, Z. and L. WAHL, 2009 The impact of host-cell dynamics on the fixation probability for lytic viruses. *Journal of Theoretical Biology* *259*(4): 799–810.
- PECK, K. M., C. H. CHAN, and M. M. TANAKA, 2015 Connecting within-host dynamics to the rate of viral molecular evolution. *Virus Evolution* *1*(1): vev013.
- PINILLA, L. T., B. P. HOLDER, Y. ABED, G. BOIVIN, and C. A. BEAUCHEMIN, 2012 The H275Y neuraminidase mutation of the pandemic A/H1N1 influenza virus lengthens the eclipse phase and reduces viral output of infected cells, potentially compromising fitness in ferrets. *Journal of virology* *86*(19): 10651–10660.
- POON, L. L., T. SONG, R. ROSENFELD, X. LIN, M. B. ROGERS, B. ZHOU, and R. SEBRA *et al.*, 2016 Quantifying influenza virus diversity and transmission in humans. *Nature Genetics* **48**: 195–200.
- RAMPHAL, R., W. FISCHLSCHWEIGER, J. W. SHANDS JR, and P. A. SMALL JR, 1979 Murine influenzal tracheitis: A model for the study of influenza and tracheal epithelial repair. *American*

- Review of Respiratory Disease **120**: 1313–1324. 534
- RAYNES, Y., A. HALSTEAD, and P. SNIEGOWSKI, 2014 The effect of population bottlenecks on 535  
mutation rate evolution in asexual populations. *J. Evol. Biol.* **27**: 161–169. 536
- RELUGA, T., R. MEZA, D. WALTON, and A. GALVANI, 2007 Reservoir interactions and disease 537  
emergence. *Theor. Popul. Biol.* **72**: 400–408. 538
- ROY, A.-M. M., J. S. PARKER, C. R. PARRISH, and G. R. WHITTAKER, 2000 Early stages of 539  
influenza virus entry into Mv-1 lung cells: involvement of dynamin. *Virology* *267*(1): 17–28. 540
- SANJUÁN, R., A. MOYA, and S. F. ELENA, 2004 The distribution of fitness effects caused 541  
by single-nucleotide substitutions in an RNA virus. *Proceedings of the National Academy of* 542  
*Sciences of the United States of America* *101*(22): 8396–8401. 543
- SMITH, A. and A. S. PERELSON, 2011 Influenza A virus infection kinetics: quantitative data and 544  
models. *Wiley Interdisciplinary Reviews: Systems Biology and Medicine* *3*(4): 429–445. 545
- STRAY, S. J. and G. M. AIR, 2001 Apoptosis by influenza viruses correlates with efficiency of 546  
viral mRNA synthesis. *Virus research* *77*(1): 3–17. 547
- TAMURA, S.-I. and T. KURATA, 2004 Defense mechanisms against influenza virus infection in the 548  
respiratory tract mucosa. *Jpn J Infect Dis* *57*(6): 236–47. 549
- VAN DE SANDT, C. E., J. H. KREIJTZ, and G. F. RIMMELZWAAN, 2012 Evasion of influenza A 550  
viruses from innate and adaptive immune responses. *Viruses* *4*(9): 1438–1476. 551
- VARBLE, A., R. A. ALBRECHT, S. BACKES, M. CRUMILLER, N. M. BOUVIER, D. SACHS, 552  
A. GARCÍA-SASTRE, and OTHERS, 2014 Influenza A virus transmission bottlenecks are defined 553  
by infection route and recipient host. *Cell host & microbe* *16*(5): 691–700. 554
- VOGWILL, T., R. L. PHILLIPS, D. R. GIFFORD, and R. C. MACLEAN, 2016 Divergent evolution 555  
peaks under intermediate population bottlenecks during bacterial experimental evolution. *Proc.* 556  
*R. Soc. Lond. B* *283*(1835): 20160749. 557
- WAHL, L. and P. J. GERRISH, 2001 The probability that beneficial mutations are lost in popu- 558  
lations with periodic bottlenecks. *Evolution* *55*(12): 2606–2610. 559

- WAHL, L., P. J. GERRISH, and I. SAIKA-VOIVOD, 2002 Evaluating the impact of population 560  
bottlenecks in experimental evolution. *Genetics* *162*(2): 961–971. 561
- WAHL, L. and A. D. ZHU, 2015 Survival probability of beneficial mutations in bacterial batch 562  
culture. *Genetics* *200*(1): 309–320. 563
- WRIGHT, P. F., R. G. WEBSTER, and OTHERS, 2001 Orthomyxoviruses. *Fields virology* **1**: 564  
1533–1579. 565

APPENDIX

566

Let  $p_{lmn}(t)$  be the probability that  $l$  free virions,  $m$  infected cells, and  $n$  mature cells exist in the focal 567  
lineage at time  $t$ , and let  $A(t)$  denote the time-dependent per virion attachment rate, which depends 568  
on the available target cells,  $y_T(t)$ , as predicted in the deterministic model 1. Parameters  $B$ ,  $C$ , and 569  
 $D$  represent the budding, clearance and cell death rates, while  $E$  denotes the rate at which cells exit 570  
the eclipse phase and begin budding. Although the stochastic model follows the mutant lineage, for 571  
simplicity we will use  $A$  as opposed to  $\tilde{A}$ , *etc.*, throughout the Appendix. Also for notational clarity 572  
we illustrate the case  $k = 1$ . Taking into account the stochastic events of attachment, budding, 573  
clearance, cell death and cell maturation, it is straightforward to demonstrate that the probability 574  
generation function (pgf) describing the time evolution of the lineage must satisfy: 575

$$\begin{aligned}
 G(t + \Delta t, \vec{x}) &= G(t, \vec{x}) + \sum_{l,m,n} p_{lmn}(t) l C \Delta t [-x_1^l x_2^m x_3^n + x_1^{l-1} x_2^m x_3^n] + \\
 &\quad \sum_{l,m,n} p_{lmn}(t) l A(t) \Delta t [-x_1^l x_2^m x_3^n + x_1^{l-1} x_2^{m+1} x_3^n] + \\
 &\quad \sum_{l,m,n} p_{lmn}(t) m E \Delta t [-x_1^l x_2^m x_3^n + x_1^l x_2^{m-1} x_3^{n+1}] + \\
 &\quad \sum_{l,m,n} p_{lmn}(t) m D \Delta t [-x_1^l x_2^m x_3^n + x_1^l x_2^{m-1} x_3^n] + \\
 &\quad \sum_{l,m,n} p_{lmn}(t) n B \Delta t [-x_1^l x_2^m x_3^n + x_1^{l+1} x_2^m x_3^n] + \\
 &\quad \sum_{l,m,n} p_{lmn}(t) n D \Delta t [-x_1^l x_2^m x_3^n + x_1^l x_2^m x_3^{n-1}]
 \end{aligned} \tag{4}$$

Taking the limit as  $\Delta t \rightarrow 0$ , Equation 4 yields the following linear partial differential equation: 576

$$\begin{aligned}
 \frac{\partial G}{\partial t} &= (A(t)x_2 + C - (A(t) + C)x_1) \frac{\partial G}{\partial x_1} \\
 &\quad + (-(E + D)x_2 + Ex_3 + D) \frac{\partial G}{\partial x_2} \\
 &\quad + (Bx_1x_3 + D - (D + B)x_3) \frac{\partial G}{\partial x_3}
 \end{aligned} \tag{5}$$



Equation 5 can be converted to a system of ordinary differential equations using the standard method of characteristics, which yields the following system of ordinary differential equations

$$\left. \begin{aligned} \frac{dx_1}{dT} &= A(t)x_2 + C - (A(t) + C)x_1 \\ \frac{dx_2}{dT} &= -(E + D)x_2 + Ex_3 + D \\ \frac{dx_3}{dT} &= Bx_1x_3 + D - (D + B)x_3 \\ \frac{dt}{dT} &= -1 \end{aligned} \right\} .$$

This system can be solved numerically to determine the value of  $G$  at time  $\tau$ , given the known initial condition corresponding to a single free virion at time  $t_0$ ,  $G(t_0, x_1, x_2, x_3) = x_1$ . For convenience we let  $\mathcal{G}(t_0, x_1) = G(\tau, x_1, 1, 1)$  under this initial condition.

The function  $\mathcal{G}(t_0, x_1)$ , then, gives the distribution of free virions at time  $\tau$ , just before disease transmission, given the lineage began with a single virion at time  $t_0$ . Composing this with the pgf of the bottleneck process, we obtain  $\mathcal{G}(t_0, 1 - F + Fx_1)$  as the pgf describing the distribution of free virions transmitted to a new host (given that one new host is infected). The probability that a given lineage, that arose at time  $t_0$ , is *not* transmitted to the new host is obtained by evaluating at  $x_1 = 0$ :

$$X(t_0) = \mathcal{G}(t_0, 1 - F) .$$

We then use this to compute the expected rate at which surviving mutant strains appear at time  $t_0$ , where “surviving” means the lineage will be transferred to the next host:

$$\nu(t_0) = \mu (1 - X(t_0)) B y_B(t_0)$$

where  $\mu$  is the probability that the mutation of interest occurs, per new virion produced. We use this to compute  $\mathcal{S}$ , the expected number of times that the mutation of interest occurs *de novo*, over

the course of the infection, and survives to be transmitted to the next host:

590

$$\mathcal{S} = \int_0^\tau \nu(t_0) dt_0 .$$

Consider dividing the time interval  $(0, \tau)$  such that  $\delta t = \tau/N$  and  $t_i = i\delta t$ . In this case for small  $\delta t$ , the quantity  $\nu(t_0)\delta t$  approximates the probability that a surviving mutation occurs during time interval  $(t_0, t_0 + \delta t)$ . This allows us to compute  $\mathcal{P}$ , the probability that the mutation of interest occurs *de novo* during the course of the infection and is transmitted to the new host:

591

592

593

594

$$\mathcal{P} = 1 - \lim_{N \rightarrow \infty} \prod_{i=0}^{N-1} \left( 1 - \nu(t_i) \frac{\tau}{N} \right)$$

which by product integration can be succinctly expressed as:

595

$$\mathcal{P} = 1 - e^{-\mathcal{S}} .$$

We also compute the expected number of mutant virions transmitted to the recipient host,  $\mathcal{N}$ . We do this by first computing  $\partial_x \mathcal{G}(t_0, x)|_{x=1}$ , which gives the expected number of mutant virions at time  $\tau$ , given that a mutant virion was produced at time  $t_0$ . We multiply this value by the number of mutant virions being produced at time  $t_0$ ,  $\mu B y_B(t_0)$ , and integrate from 0 to  $\tau$ , to get the total expected number of mutant virions at time  $\tau$ . Multiplying by the bottleneck fraction,  $F$ , gives the expected number of mutant virions transmitted to the recipient host:

596

597

598

599

600

601

$$\mathcal{N} = F \int_0^\tau \mu B y_B(t_0) \cdot \partial_x \mathcal{G}(t_0, x)|_{x=1} dt_0 .$$

Note that  $\mathcal{S}$  and  $\mathcal{N}$  differ because each *de novo* mutation produces a lineage that could in principle contribute more than one virion to the recipient.

602

603

## Supplementary Figures

### S1. Expected number of successful *de novo* occurrences, $\mathcal{S}$

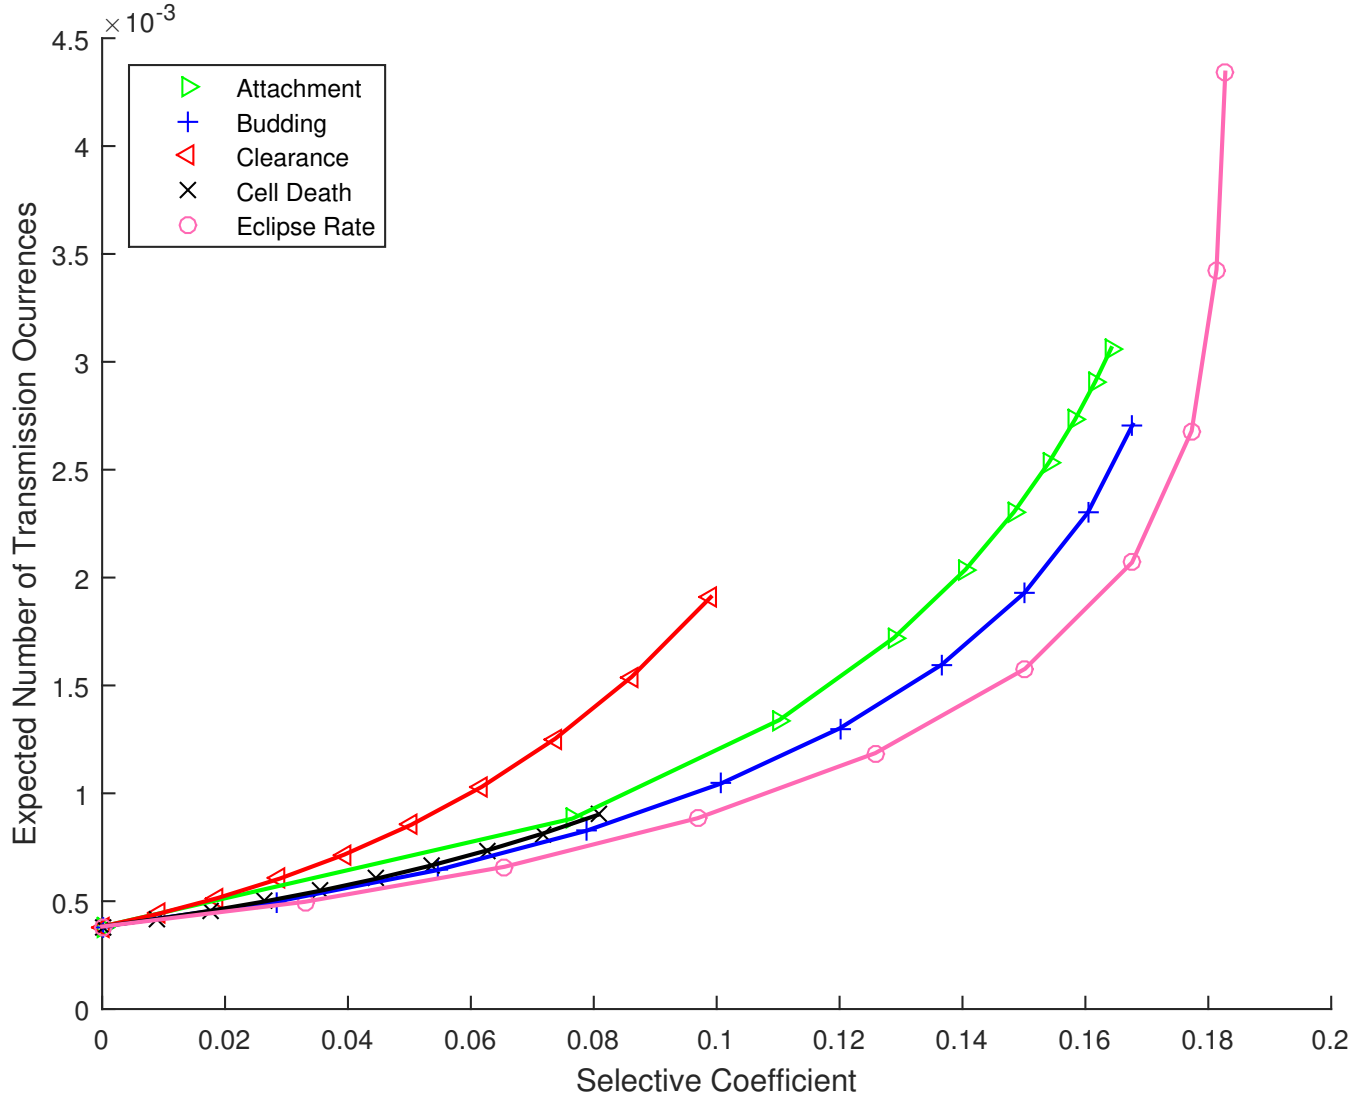

Figure S1: The number of times that a given mutation is expected to arise *de novo*, during a single infection time course, and produce a lineage that is transmitted to the next infected individual ( $\mathcal{S}$ , as described in the Appendix), versus the selective coefficient. This quantity scales linearly with  $\mu$ , the mutation rate.

## S2. Expected number of transmitted mutant virions, $\mathcal{N}$

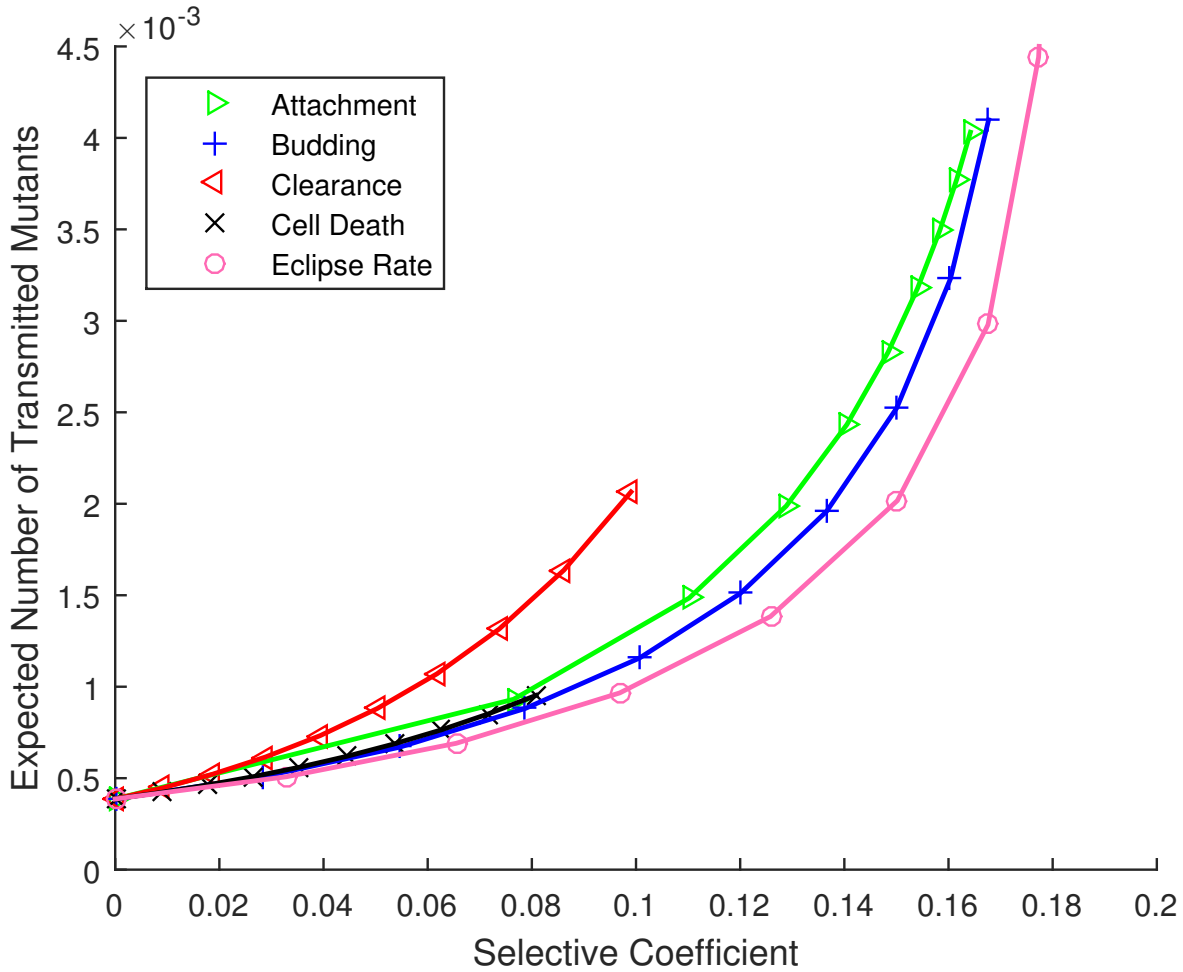

Figure S2: The expected number of virions transmitted to the recipient that have arisen *de novo* during a single infection time course in the donor ( $\mathcal{N}$ , as described in the Appendix), versus the selective coefficient.

### S3. Effect of non-exponential cell lifetimes: Deterministic time course

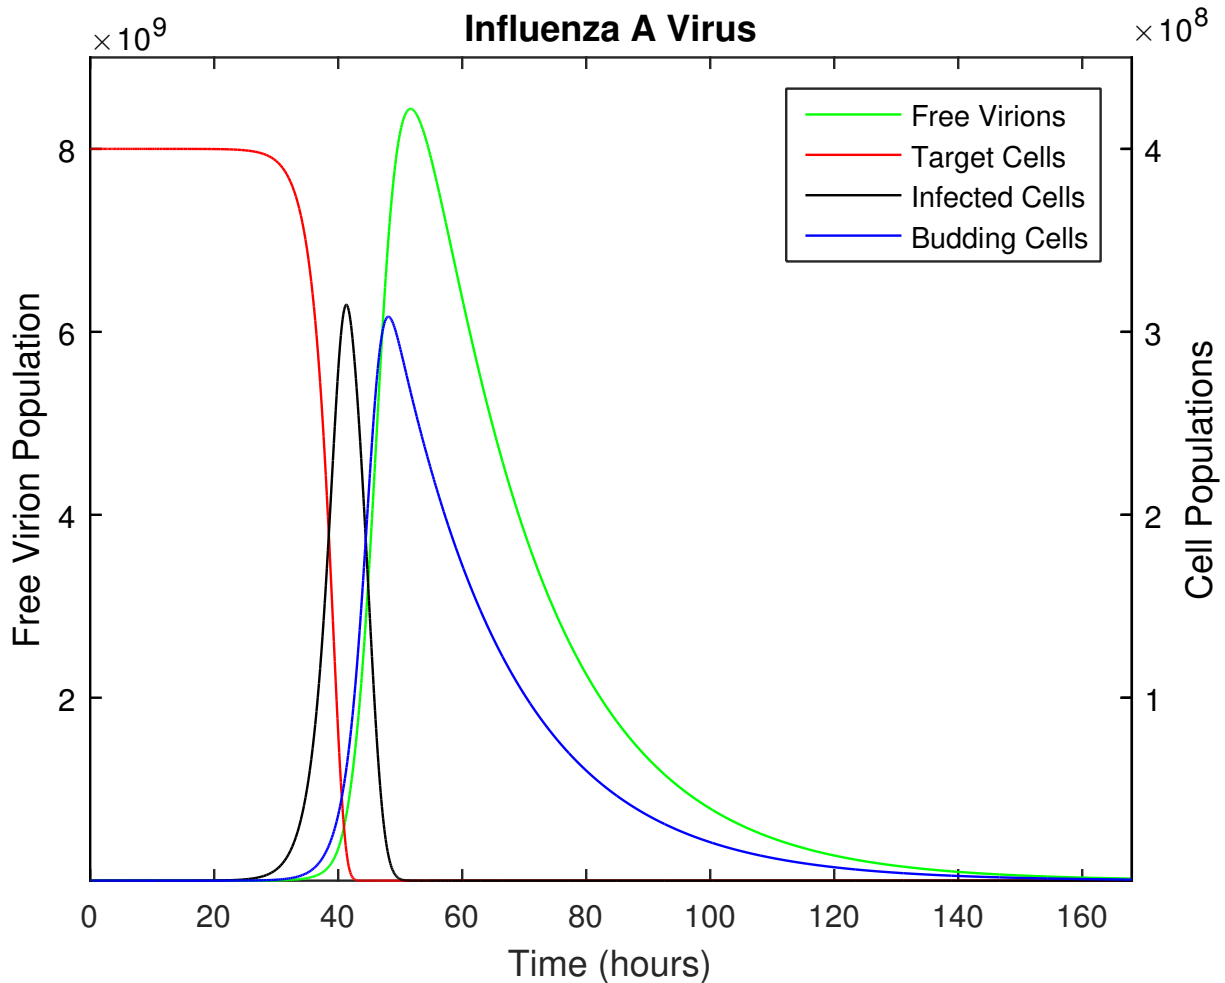

Figure S3: The time course of influenza A infection over the span of a week (168 hours). This figure is analogous to Figure 1, except that the cell death rate,  $D$ , has been set to zero during the eclipse stages, and increased during the budding phase such that the mean infected cell lifetime is unchanged. Other parameters as provided in Table 1. The infection time course is relatively insensitive to these changes in the distribution of infected cell lifetimes.

#### S4. Effect of non-exponential cell lifetimes: Transmission probability

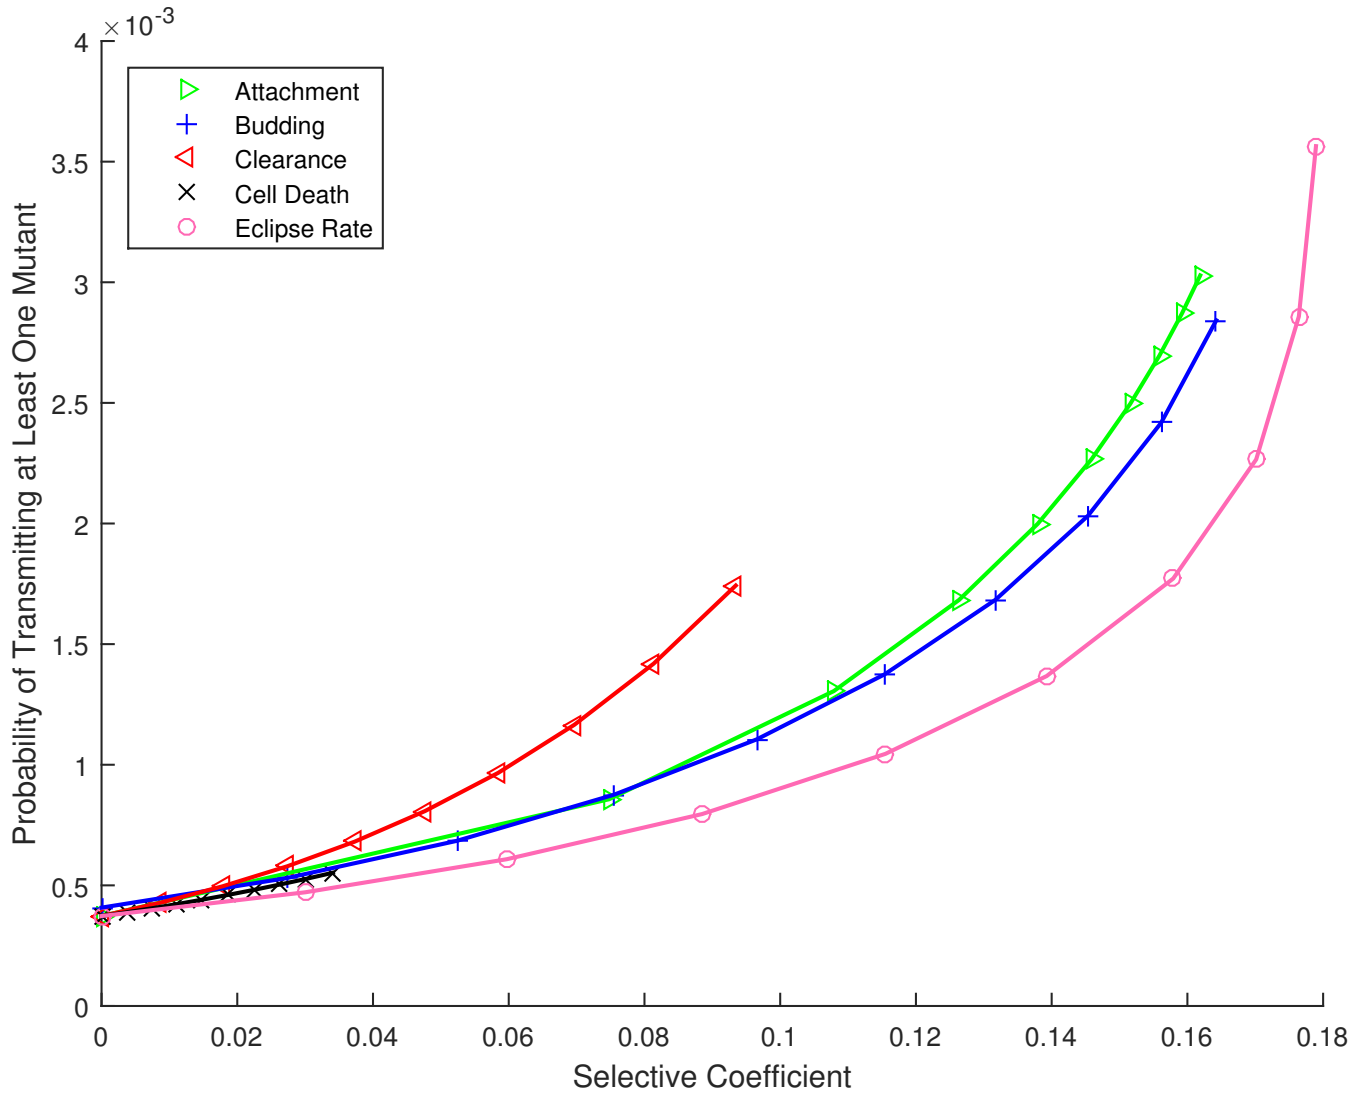

Figure S4: The probability that at least one *de novo* mutation arises during the infection time course and is passed to the next host,  $\mathcal{P}$ , versus the selective coefficient,  $s$ . This figure is analogous to Figure 2, except that the cell death rate,  $D$ , has been set to zero during the eclipse stages, and increased during the budding phase to yield the same mean infected cell lifetime. Other parameters as provided in Table 1. We find that the transmission of *de novo* mutations is insensitive to these changes in the distribution of infected cell lifetimes.

## S5. Effect of available target cells: Deterministic time course

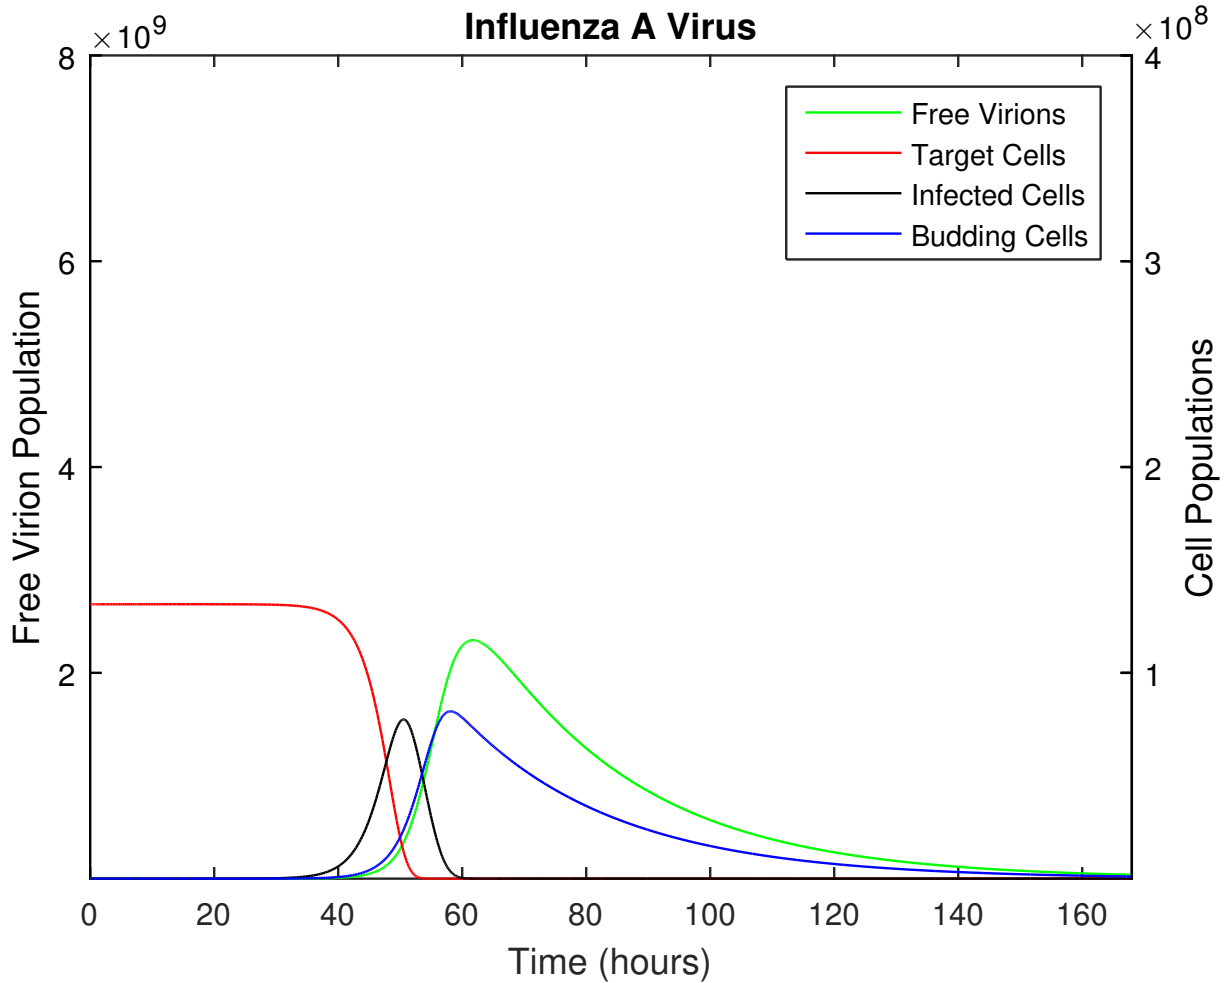

Figure S5: The time course of influenza A infection over the span of a week (168 hours). This figure is analogous to Figure 1, except that the initial target cell population,  $y_T(0)$ , has been reduced by a factor of 3. Although complete desquamation is the expected outcome of the infection, it is possible that spatial considerations might spare a fraction of the epithelial cells in the upper respiratory tract; we therefore included this case in sensitivity analysis. Other parameters as provided in Table 1. Comparing with Figure 1, the magnitude of the infection is scaled and the dynamics are slightly delayed. However this has little impact on the probability of transmission of a mutation (see Figure S6).

## S6. Effect of number of available target cells: Transmission probability

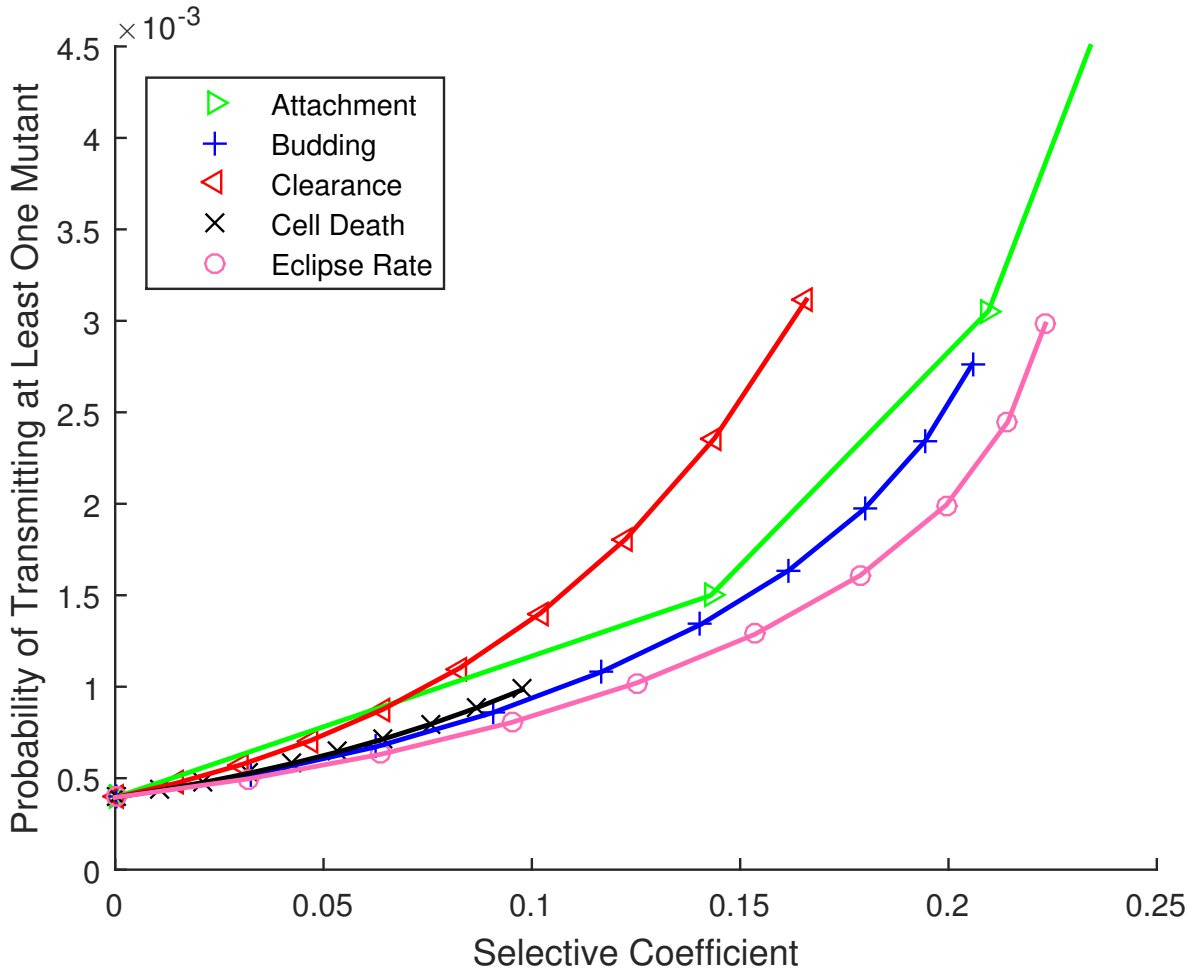

Figure S6: The probability that at least one *de novo* mutation arises during the infection time course and is passed to the next host,  $\mathcal{P}$ , versus the selective coefficient,  $s$ . This figure is analogous to Figure 2, except that the initial target cell population,  $y_T(0)$ , has been reduced by a factor of 3. Other parameters are as provided in Table 1. We find that the transmission of *de novo* mutations is insensitive to the initial number of available target cells.



## S7. Effect of varying mutation rate

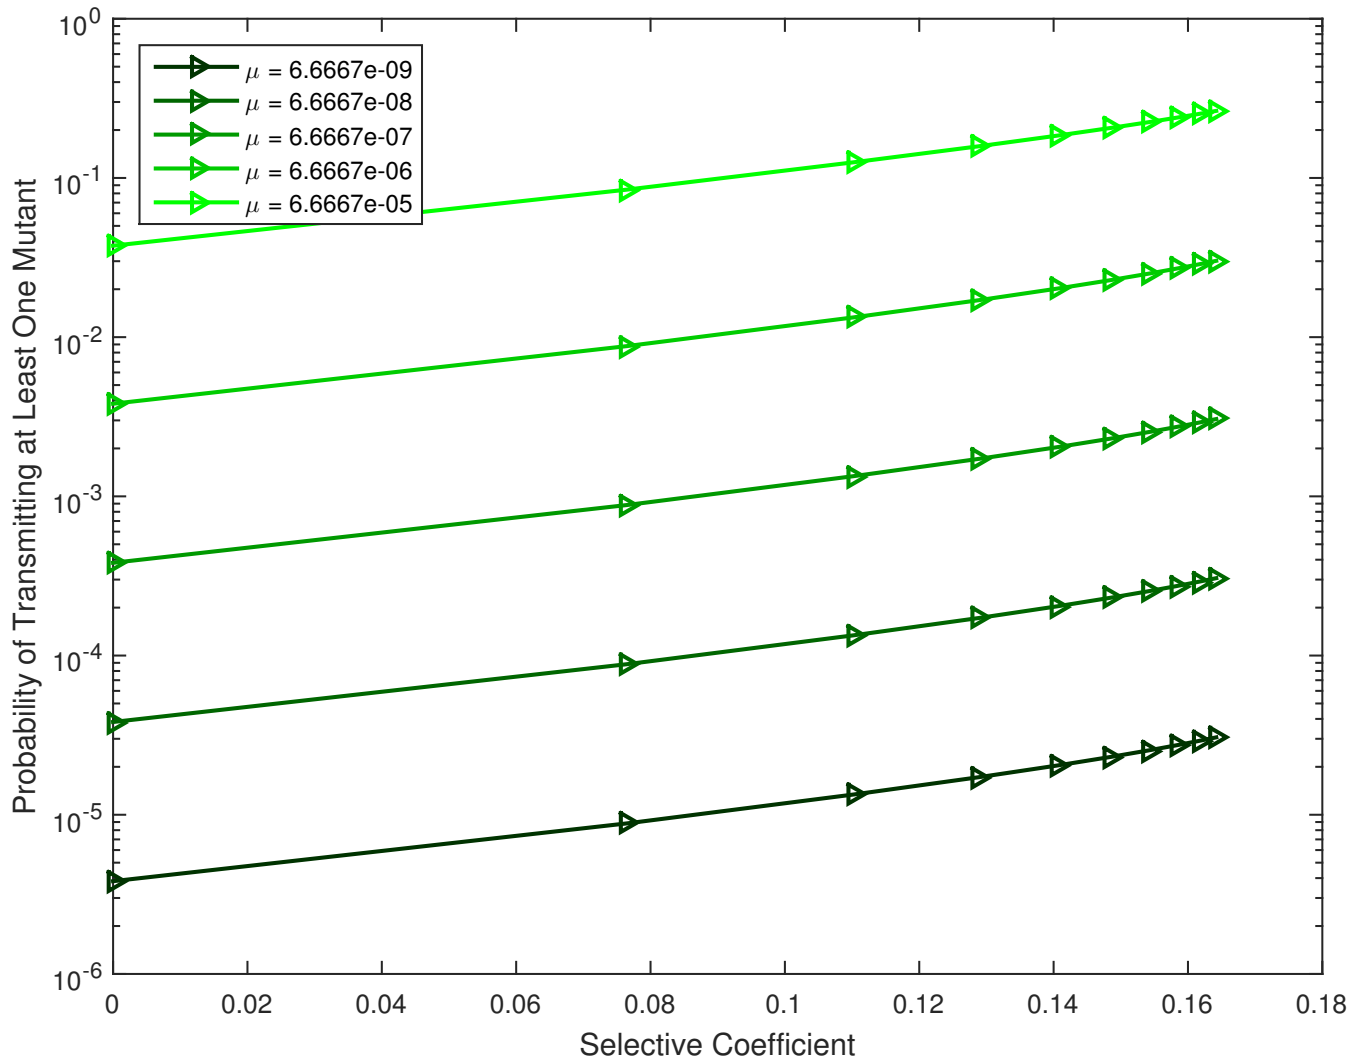

Figure S7: The effect of mutation rate on the probability of transmission. The probability that at least one copy of a *de novo* mutation is transmitted to the next host is plotted against the selective coefficient, for a mutation that increases the viral attachment rate. The mutation rate per replication event,  $\mu$ , is varied. Other parameters as provided in Table 1.
